# Supplementary material for: Untargeted Metabolomics Profiling of an 80.5 km Simulated Treadmill Ultramarathon
Source: PubMed Central journal article supplement (PMC5876003; doi:10.3390/metabo8010014), 2018-02-13

**Figure S1** Comparison of two sets of baseline samples based on 446 polar metabolites showing no clear separation between samples taken >2 weeks before the trial (B) and immediately before the trial (C).

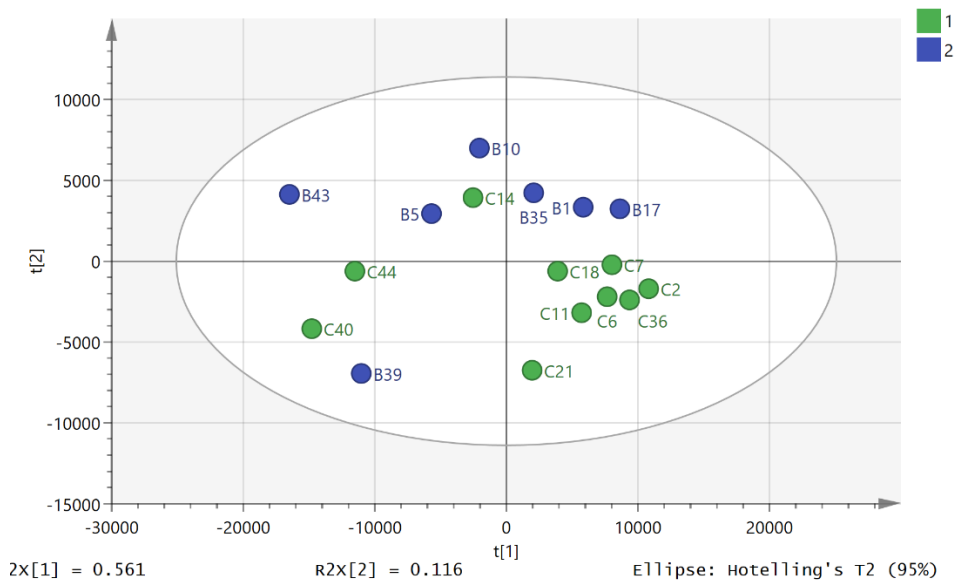

**Figure S2** Comparison of baseline samples based on 300 lipophilic metabolites showing no clear separation between samples taken >2 weeks before the trial (B) and immediately before the trial (C).

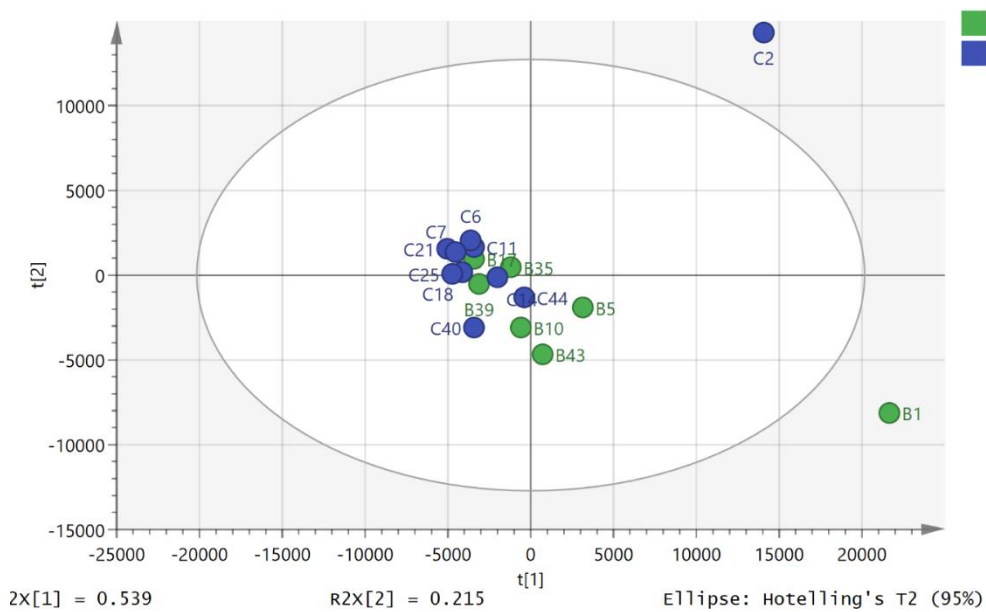

**Table S1** Significant metabolites run with matching standard.† Run on ACE C4 column in comparison with pooled post-80K sample 12 months after original run.

| Mass     | Rt of std<br>min | Rt in plasma<br>min |                           |
|----------|------------------|---------------------|---------------------------|
| 89.0477  | 14.4             | 14.4                | Alanine                   |
| 103.063  | 13.6             | 13.4                | 3-Amino-isobutanoate      |
| 105.043  | 15.6             | 15.7                | Serine                    |
| 115.063  | 12.3             | 12.4                | Proline                   |
| 117.079  | 12.1             | 12.1                | Valine                    |
| 117.079  | 10.8             | 10.8                | Betaine                   |
| 119.058  | 14.3             | 14.4                | Threonine                 |
| 125.015  | 15.3             | 15.4                | Taurine                   |
| 129.043  | 14.5             | 14.1                | 5-Oxoproline              |
| 131.058  | 14.9             | 14.1                | Hydroxyproline isomer     |
| 131.095  | 10.2             | 10.3                | Leucine                   |
| 131.095  | 10.7             | 10.8                | Isoleucine                |
| 132.053  | 15.1             | 15.2                | Asparagine                |
| 132.097  | 22.6             | 22.6                | Ornithine                 |
| 138.043  | 8.7              | 8.8                 | Urocanate                 |
| 146.069  | 14.8             | 14.8                | Glutamine                 |
| 146.106  | 24.1             | 23.8                | Lysine                    |
| 147.053  | 11.1             | 11.2                | Glutamate                 |
| 149.051  | 11.2             | 11.2                | Methionine                |
| 165.079  | 9.6              | 9.6                 | Phenylalanine             |
| 174.112  | 25.6             | 25.4                | Arginine                  |
| 175.096  | 15.6             | 15.6                | Citrulline                |
| 181.074  | 12.7             | 12.8                | Tyrosine                  |
| 188.116  | 14.5             | 16.2                | N6-Acetyl-L-lysine isomer |
| 189.043  | 7.4              | 6.4                 | Kynurenate                |
| 204.090  | 11.1             | 11.1                | Tryptophan                |
| 204.1227 | 10.3             | 10.3                | Acetylcarnitine           |
| 136.039  | 9.8              | 9.8                 | Hypoxanthine              |

|         |      |      |                              |
|---------|------|------|------------------------------|
| 244.069 | 9.5  | 9.5  | Uridine                      |
| 252.209 | 16.0 | 16.0 | +Hexadecadienoic acid isomer |
| 252.209 | 16.8 | 16.8 | +Hexadecadienoic acid isomer |
| 254.225 | 17.7 | 17.7 | +Palmitoleic acid            |
| 260.185 | 2.8  | 2.7  | +Hexanoylcarnitine           |
| 276.210 | 15.8 | 15.8 | +Octatetraenoic acid         |
| 278.225 | 17.1 | 17.1 | +Linolenic acid              |
| 280.239 | 18.6 | 18.6 | +Linoleic acid               |
| 282.256 | 20.3 | 20.3 | +Oleic acid                  |
| 288.216 | 4.3  | 4.2  | +Octanoylcarnitine           |
| 316.248 | 7.0  | 6.9  | +Decanoylcarnitine           |
| 328.241 | 18.4 | 18.4 | +Docosahexenoic acid         |
| 330.257 | 19.2 | 19.2 | +Docasopentaenoic acid       |
| 344.278 | 10.1 | 10.4 | +Dodecanoylcarnitine         |
| 372.311 | 14.1 | 14.3 | +Tetradecanoylcarnitine      |
| 465.309 | 4.5  | 4.9  | Glycocholate                 |
| 515.291 |      | 4.5  | Taurocholate                 |

**Table S2** List of 231 standards run on the ZICpHILIC and ACE C4 columns.

| Compound name                     | Elemental Composition |
|-----------------------------------|-----------------------|
| Malate                            | C4H6O5                |
| Phenylethylamine                  | C8H11N                |
| 2-(4-Hydroxyphenyl) ethanol       | C8H10O2               |
| 2,6-Quinolinediol                 | C9H7NO2               |
| 2-deoxyribose-5-phosphate         | C5H11O7P              |
| 2-Hydroxybutanoic acid            | C4H8O3                |
| 2-Indolecarboxylic acid           | C9H7NO2               |
| 2-Oxoglutarate                    | C5H6O5                |
| 2-phosphoglycerate                | C3H7O7P               |
| 3-(2-Hydroxyphenyl)propanoic acid | C9H10O3               |
| 3-indole acetate                  | C10H9NO2              |
| 3-Phenylpropionylglycine          | C11H13NO3             |
| 3-Phosphoglycerate                | C3H7O7P               |

|                                  |                |
|----------------------------------|----------------|
| 4-Coumarate                      | C9H8O3         |
| 4-Hydroxy-L-glutamate            | C5H7NO5        |
| 4-Hydroxyphenylacetate           | C8H8O3         |
| 5-Aminolevulinate                | C5H9NO3        |
| 5-Hydroxyindoleacetate           | C10H9NO3       |
| 5-methylcytidine                 | C10H15N3O5     |
| 5'-Methylthioadenosine           | C11H15N5O3S    |
| 5-Oxoproline                     | C5H7NO3        |
| 5-phospho-D-ribose-1-diphosphate | C5H13O14P3     |
| 6-Phospho-D-gluconate            | C6H13O10P      |
| 7-Methylguanosine(+)             | C11H15N5O5     |
| Acetoacetate                     | C4H6O3         |
| Adenine                          | C5H5N5         |
| Adenosine                        | C10H13N5O4     |
| ADP                              | C10H15N5O10P2  |
| Allantoin                        | C4H6N4O3       |
| AMP                              | C10H14N5O7P    |
| Amphetamine                      | C9H13N         |
| Ascorbate                        | C6H8O6         |
| ATP                              | C10H16N5O13P3  |
| beta-Alanine                     | C3H7NO2        |
| beta-D-Fructose-1,6-bisphosphate | C6H14O12P2     |
| Betaine                          | C5H11NO2       |
| Bilirubin                        | C33H36N4O6     |
| Biopterin                        | C9H11N5O3      |
| Biotin                           | C10H16N2O3S    |
| Caffeate                         | C9H8O4         |
| Cytidine diphosphate             | C9H15N3O11P2   |
| Cholate                          | C24H40O5       |
| Choline                          | C5H13NO        |
| Cis-4-Hydroxy-D-Proline          | C5H9NO3        |
| Cis-Aconitate                    | C6H6O6         |
| Citraconate                      | C5H6O4         |
| Citramalate                      | C5H8O5         |
| Citrate                          | C6H8O7         |
| CMP                              | C9H14N3O8P     |
| CoA                              | C21H36N7O16P3S |
| creatine                         | C4H9N3O2       |
| Creatinine                       | C4H7N3O        |
| CTP                              | C9H16N3O14P3   |
| Cystathionine                    | C7H14N2O4S     |
| Cysteine                         | C3H7NO2S       |
| Cytidine                         | C9H13N3O5      |
| Cytosine                         | C4H5N3O        |

|                               |               |
|-------------------------------|---------------|
| D(+)-2-Phosphoglyceric acid   | C3H7O7P       |
| D-2-Hydroxyglutaric acid      | C5H8O5        |
| D-3-hydroxy-butyrat           | C4H8O3        |
| dAMP                          | C10H14N5O6P   |
| Deoxyribose                   | C5H10O4       |
| D-Galacturonate               | C6H10O7       |
| D-Gluconic acid               | C6H12O7       |
| D-Glucosamine                 | C6H13NO5      |
| D-Glucosamine 6-Phosphate     | C6H14NO8P     |
| D-Glucuronate                 | C6H10O7       |
| D-Glucuronolactone            | C6H8O6        |
| Dihydrobiopterin              | C9H13N5O3     |
| Dihydroxyacetone phosphate    | C3H7O6P       |
| Dimethyl-L-lysine             | C8H18N2O2     |
| D-Isoascorbic acid            | C6H8O6        |
| DL-3-aminobutyrate            | C4H9NO2       |
| DL-Glyceraldehyde 3-phosphate | C3H7O6P       |
| Dopamine                      | C8H11NO2      |
| D-Ribose 5-phosphate          | C5H11O8P      |
| D-Ribulose 5-phosphate        | C5H11O8P      |
| D-Sorbitol                    | C6H14O6       |
| D-Xylulose 5-phosphate        | C5H11O8P      |
| Ectoine                       | C6H10N2O2     |
| Ethanolamine phosphate        | C2H8NO4P      |
| FAD                           | C27H33N9O15P2 |
| Folate                        | C19H19N7O6    |
| Fructose                      | C6H12O6       |
| Fructose 6 phosphate          | C6H13O9P      |
| Fucose                        | C6H12O5       |
| Fumarate                      | C4H4O4        |
| Galactarate                   | C6H10O8       |
| galactose                     | C6H12O6       |
| galactose 1 phosphate         | C6H13O9P      |
| Gallate                       | C7H6O5        |
| GDP                           | C10H15N5O11P2 |
| Glucose                       | C6H12O6       |
| Glucose 1 phosphate           | C6H13O9P      |
| Glucose 6 phosphate           | C6H13O9P      |
| Glutathione                   | C10H17N3O6S   |
| Glycine                       | C2H5NO2       |
| Glycocholic acid              | C26H43NO6     |
| GMP                           | C10H14N5O8P   |
| Guanine                       | C5H5N5O       |
| Guanosine                     | C10H13N5O5    |

|                        |               |
|------------------------|---------------|
| Hippuric acid          | C9H9NO3       |
| Histamine              | C5H9N3        |
| Homo-arginine          | C7H16N4O2     |
| Homogentisate          | C8H8O4        |
| Hypoxanthine           | C5H4N4O       |
| Imidazole-4-acetate    | C5H6N2O2      |
| IMP                    | C10H13N4O8P   |
| Indole                 | C8H7N         |
| Indole-3-lactic acid   | C11H11NO3     |
| Inosine                | C10H12N4O5    |
| Isocitrate             | C6H8O7        |
| Isonicotinic acid      | C6H5NO2       |
| Itaconate              | C5H6O4        |
| Ketobutyric acid       | C4H6O3        |
| Kynurenic acid         | C10H7NO3      |
| Lactic acid            | C3H6O3        |
| Lactoylglutathione     | C13H21N3O8S   |
| L-Adrenaline           | C9H13NO3      |
| L-Alanine              | C3H7NO2       |
| L-Arabinose            | C5H10O5       |
| L-Arginine             | C6H14N4O2     |
| L-Asparagine           | C4H8N2O3      |
| L-Aspartate            | C4H7NO4       |
| L-Carnosine            | C9H14N4O3     |
| L-Citrulline           | C6H13N3O3     |
| L-Cystine              | C6H12N2O4S2   |
| L-Glutamate            | C5H9NO4       |
| L-Glutamine            | C5H10N2O3     |
| L-Glutathione oxidized | C20H32N6O12S2 |
| L-Histidine            | C6H9N3O2      |
| L-Homocysteine         | C4H9NO2S      |
| L-Homoserine           | C4H9NO3       |
| L-Homoserine Lactone   | C4H7NO2       |
| Lipoate                | C8H14O2S2     |
| L-isoleucine           | C6H13NO2      |
| Lithocholic acid       | C24H40O3      |
| L-Kynurenine           | C10H12N2O3    |
| L-Leucine              | C6H13NO2      |
| L-Lysine               | C6H14N2O2     |
| L-Metanephrine         | C10H15NO3     |
| L-Methionine           | C5H11NO2S     |
| L-Noradrenaline        | C8H11NO3      |
| L-Ornithine            | C5H12N2O2     |
| L-Phenylalanine        | C9H11NO2      |

|                                    |               |
|------------------------------------|---------------|
| L-Proline                          | C5H9NO2       |
| L-Saccharopine                     | C11H20N2O6    |
| L-Serine                           | C3H7NO3       |
| L-Threonic acid                    | C4H8O5        |
| L-Threonine                        | C4H9NO3       |
| L-Tryptophan                       | C11H12N2O2    |
| L-Tyrosine                         | C9H11NO3      |
| L-Valine                           | C5H11NO2      |
| Maleic acid                        | C4H4O4        |
| Malonate                           | C3H4O4        |
| Maltose                            | C12H22O11     |
| Mannitol                           | C6H14O6       |
| mannose                            | C6H12O6       |
| Melatonin                          | C13H16N2O2    |
| Mesaconate                         | C5H6O4        |
| Methyl-L-lysine                    | C7H16N2O2     |
| Methylmalonate                     | C4H6O4        |
| N(pi)-Methyl-L-histidine           | C7H11N3O2     |
| N6-Acetyl-L-Lysine                 | C8H16N2O3     |
| N6-Trimethyl-L-lysine              | C9H20N2O2     |
| N-Acetyl-D-Glucosamine             | C8H15NO6      |
| N-Acetyl-D-glucosamine 6-phosphate | C8H16NO9P     |
| N-Acetyl-D-mannosamine             | C8H15NO6      |
| N-Acetylglutamine                  | C7H12N2O4     |
| N-Acetyl-L-aspartate               | C6H9NO5       |
| N-Acetyl-L-glutamate               | C7H11NO5      |
| NAD+                               | C21H27N7O14P2 |
| NADP(+)                            | C21H28N7O17P3 |
| NADPH                              | C21H30N7O17P3 |
| N-Formyl-L-methionine              | C6H11NO3S     |
| Nicotinamide                       | C6H6N2O       |
| Nicotinate                         | C6H5NO2       |
| O-Acetylcarnitine                  | C9H17NO4      |
| O-Acetylcarnitine(+)               | C9H17NO4      |
| O-Acetyl-L-serine                  | C5H9NO4       |
| Octopamine                         | C8H11NO2      |
| Oxalate                            | C2H2O4        |
| Oxypurinol                         | C5H4N4O2      |
| Pantothenate                       | C9H17NO5      |
| Paraxanthine                       | C7H8N4O2      |
| Phenylephrine                      | C9H13NO2      |
| Phosphocreatine                    | C4H10N3O5P    |
| Phosphoenolpyruvate                | C3H5O6P       |
| Phthalate                          | C8H6O4        |

|                                           |               |
|-------------------------------------------|---------------|
| Picolinic acid                            | C6H5NO2       |
| Putrescine                                | C4H12N2       |
| Pyridoxal                                 | C8H9NO3       |
| Pyridoxamine                              | C8H12N2O2     |
| Pyruvate                                  | C3H4O3        |
| Rhamnose                                  | C6H12O5       |
| Riboflavin                                | C17H20N4O6    |
| ribose                                    | C5H10O5       |
| Ribose 1,5-diphosphate                    | C5H12O11P2    |
| Ribothymidine                             | C10H14N2O6    |
| S-Adenosyl-L-homocysteine                 | C14H20N6O5S   |
| S-Adenosyl-L-methionine(easy degradation) | C15H22N6O5S   |
| Sarcosine                                 | C3H7NO2       |
| Serotonin                                 | C10H12N2O     |
| sn-Glycerol 3-phosphate                   | C3H9O6P       |
| Spermidine                                | C7H19N3       |
| Spermine                                  | C10H26N4      |
| Succinate                                 | C4H6O4        |
| Sucrose                                   | C12H22O11     |
| Taurine                                   | C2H7NO3S      |
| Taurocholate                              | C26H45NO7S    |
| Thiamine                                  | C12H16N4OS    |
| Thymidine                                 | C10H14N2O5    |
| Tryptophanol                              | C10H11NO      |
| UDP                                       | C9H14N2O12P2  |
| UDP-N-acetyl-D-glucosamine                | C17H27N3O17P2 |
| UMP                                       | C9H13N2O9P    |
| Uracil                                    | C4H4N2O2      |
| Urate                                     | C5H4N4O3      |
| Uridine                                   | C9H12N2O6     |
| Uridine 5'-diphosphoglucose               | C15H24N2O17P2 |
| Urocanate                                 | C6H6N2O2      |
| UTP                                       | C9H15N2O15P3  |
| Xanthine                                  | C5H4N4O2      |
| Xanthosine                                | C10H12N4O6    |
| Xylitol                                   | C5H12O5       |
| Xylose                                    | C5H10O5       |
| Hexanoylcarnitine                         | C13H26NO4     |
| Octanoyl carnitine                        | C15H30NO4     |
| Decanoyl carnitine                        | C17H34NO4     |
| Dodecanoyl carnitine                      | C19H38NO4     |
| Tetradecanoyl carnitine                   | C21H42NO4     |



Figures A3-A80 show graphical comparisons between the absolute response for selected metabolites for pre-80K and post 80K samples and baseline and pre-80K samples.

**Figure S3** Dodecadienoic acid in pre-80K and post-80K samples

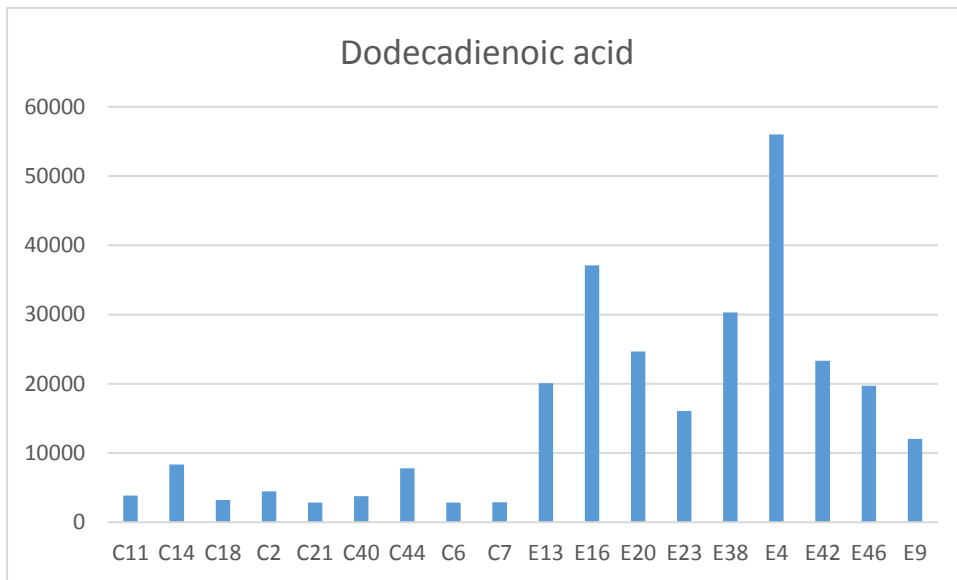

**Figure S4** Dodecadienoic acid in baseline and pre-80K samples

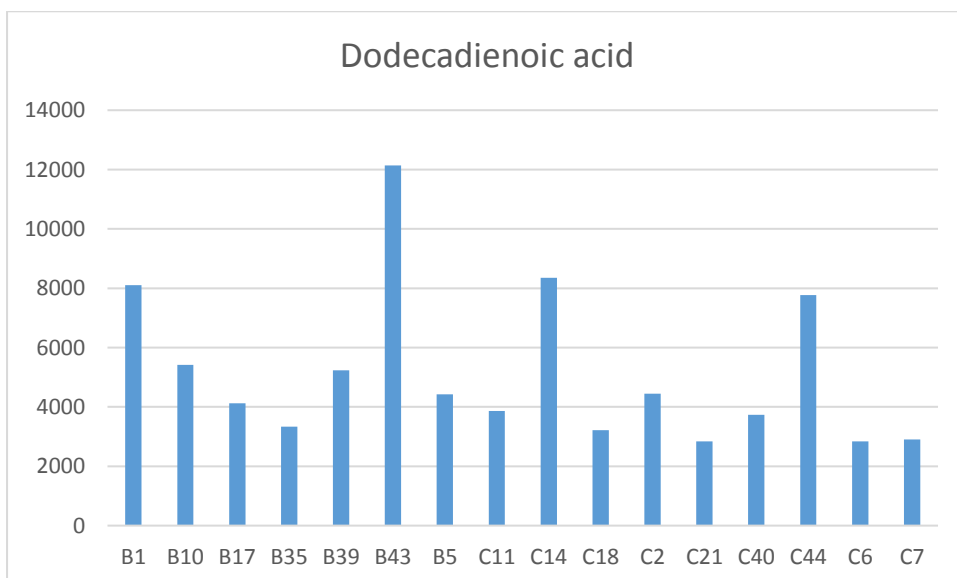

**Figure S5** Tridecenoic acid in pre-80K and post-80K samples

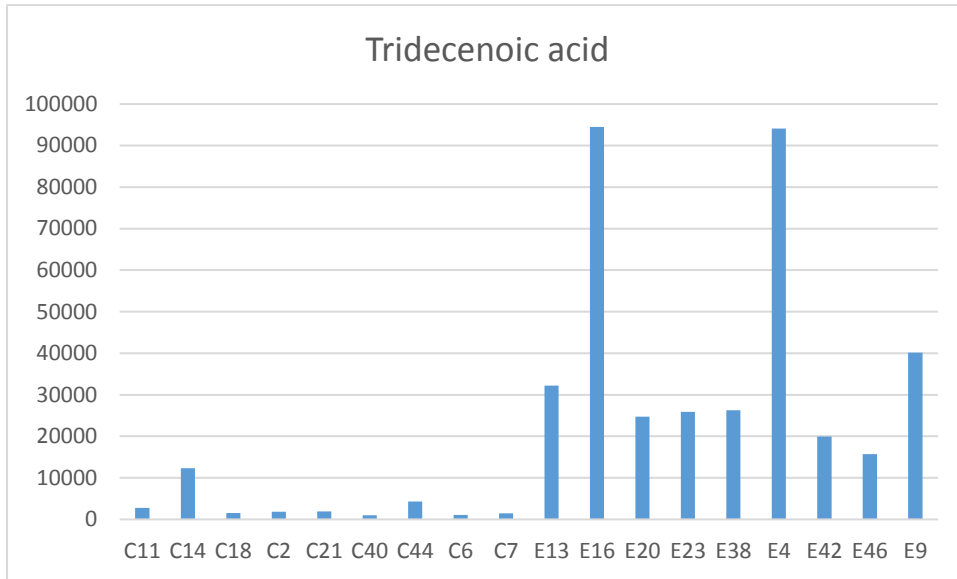

**Figure S6** Tridecenoic acid in baseline and pre-80K samples

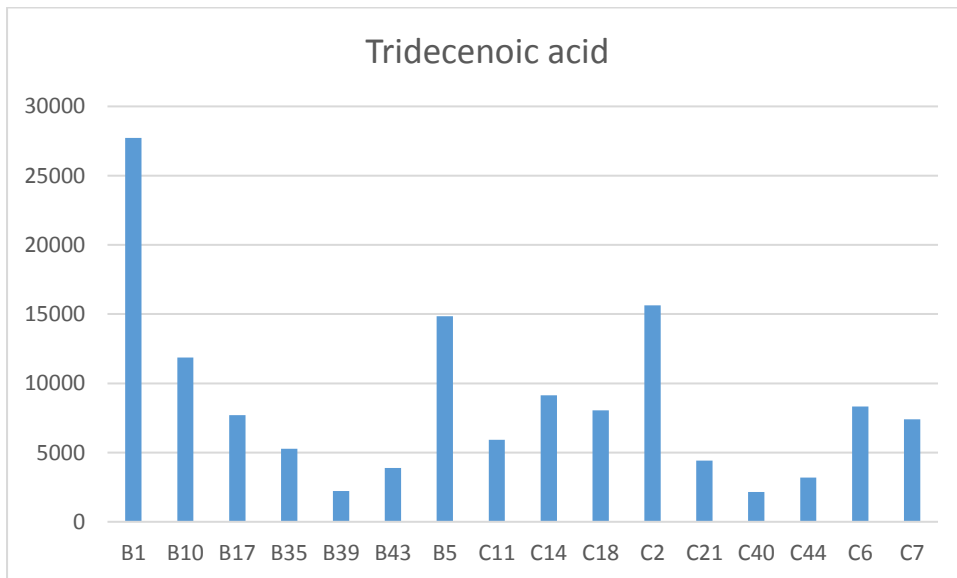

**Figure S7** Tetradecadienoic acid in pre-80K and post-80K samples

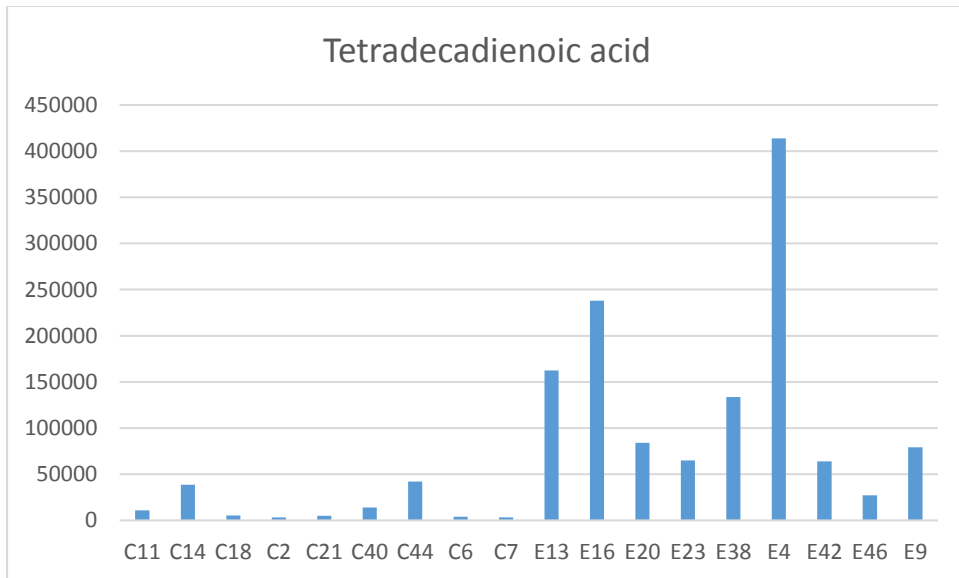

**Figure S8** Tetradecadienoic acid in baseline and pre-80K samples

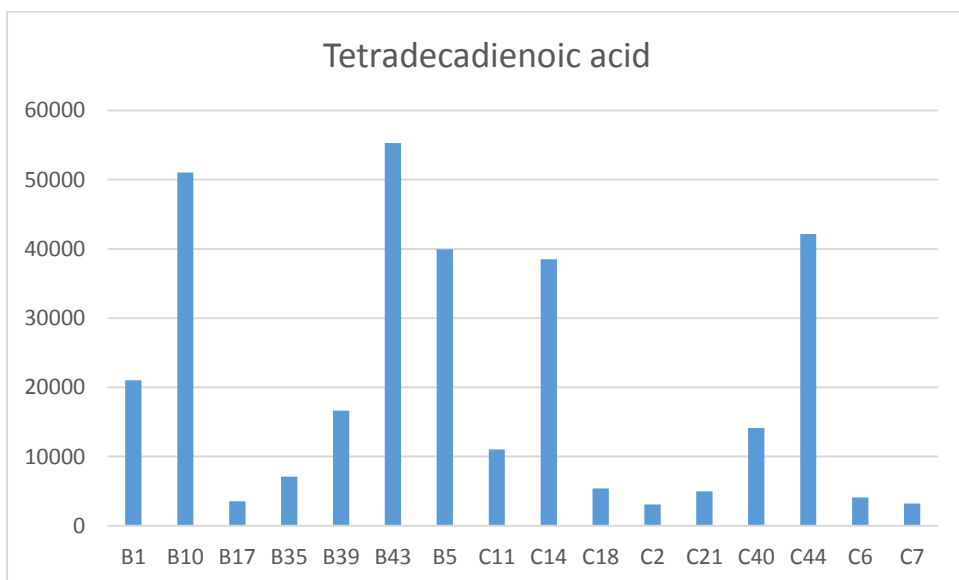

**Figure S9** Tetradecenoic acid in pre-80K and post-80K samples

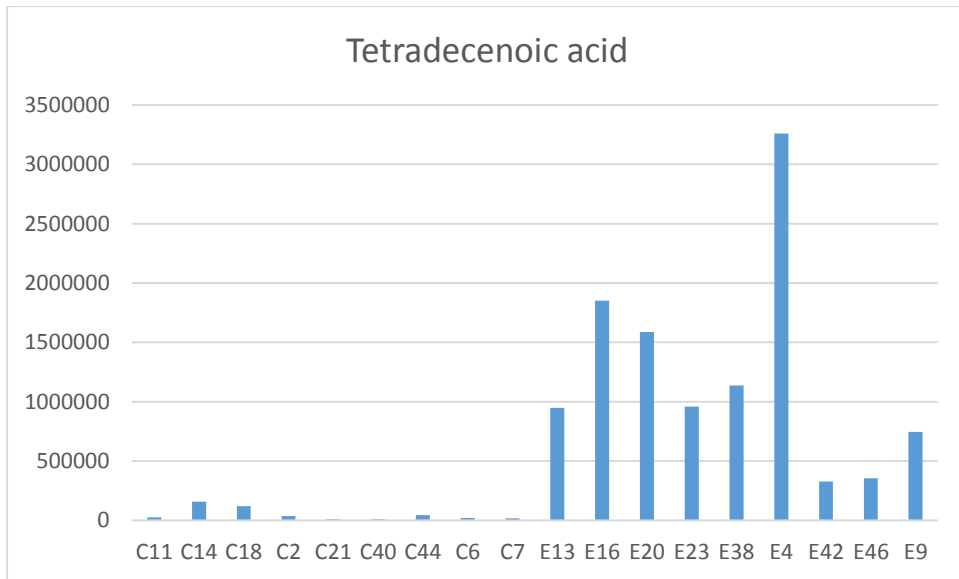

**Figure S10** Tetradecenoic acid in baseline and pre-80K samples

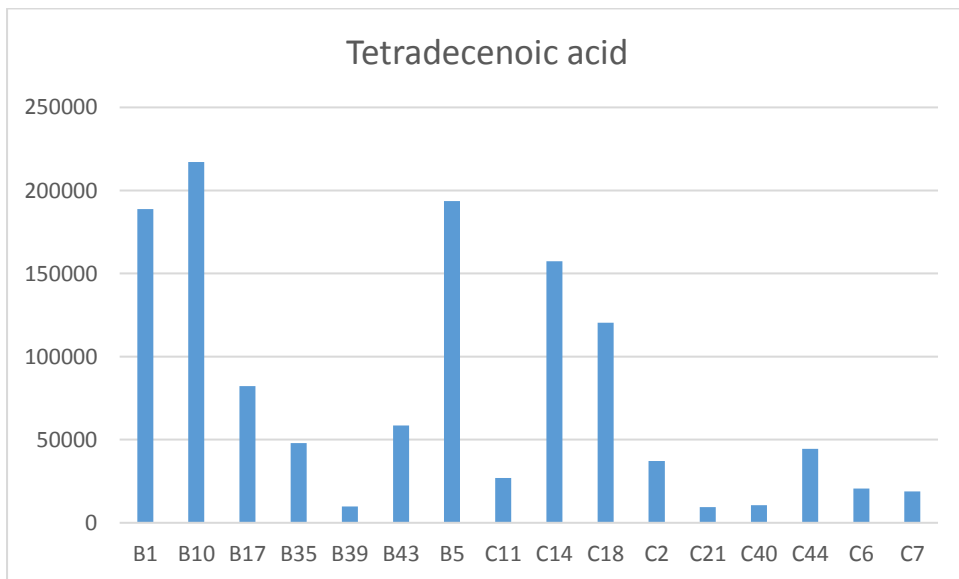

**Figure S11** Hexadecadienoic acid in pre-80K and post-80K samples

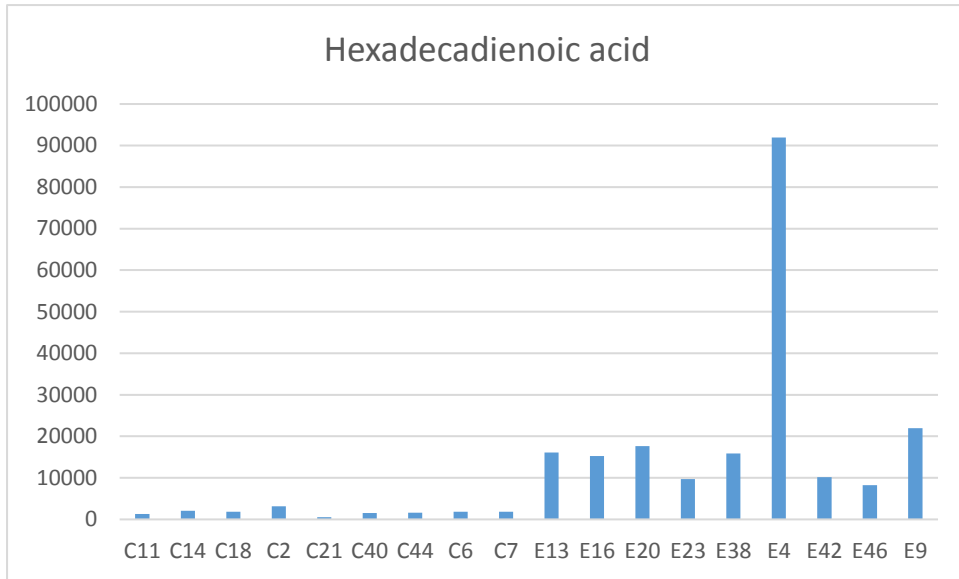

**Figure S12** Hexadecadienoic acid in baseline and pre-80K samples

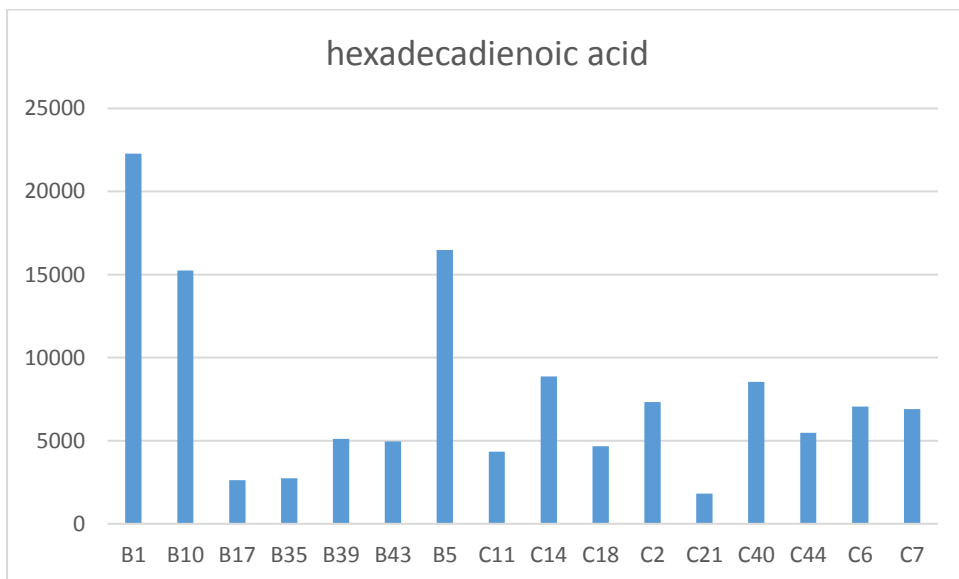

**Figure S13** Hexadecenoic acid in pre-80K and post-80K samples

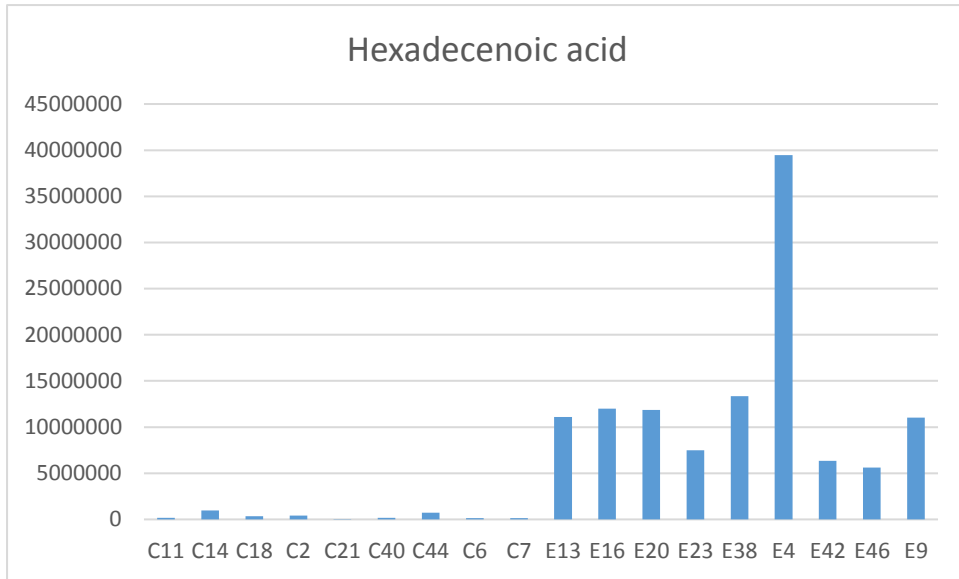

**Figure S14** Hexadecenoic acid in baseline and pre-80K samples

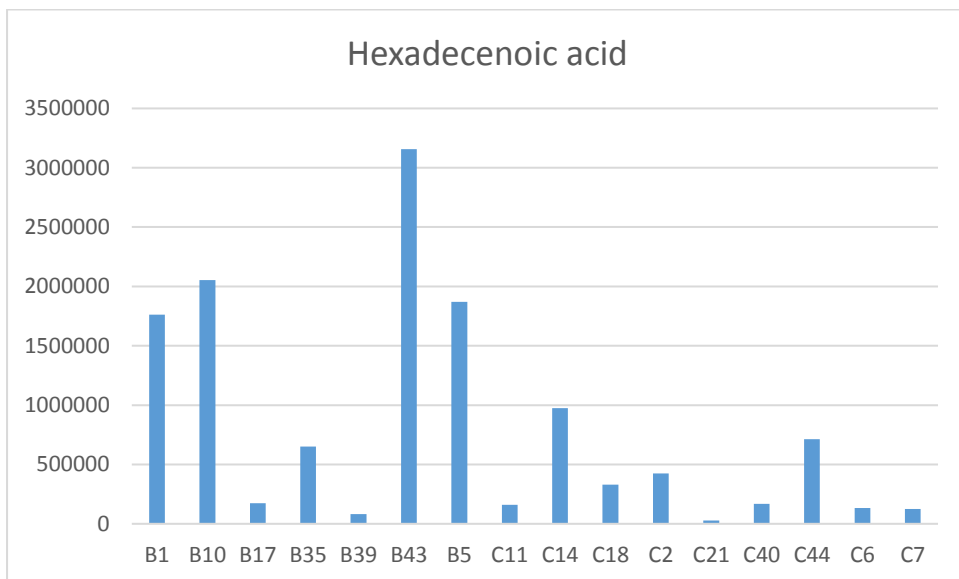

**Figure S15** Heptadecenoic acid in pre-80K and post-80K samples

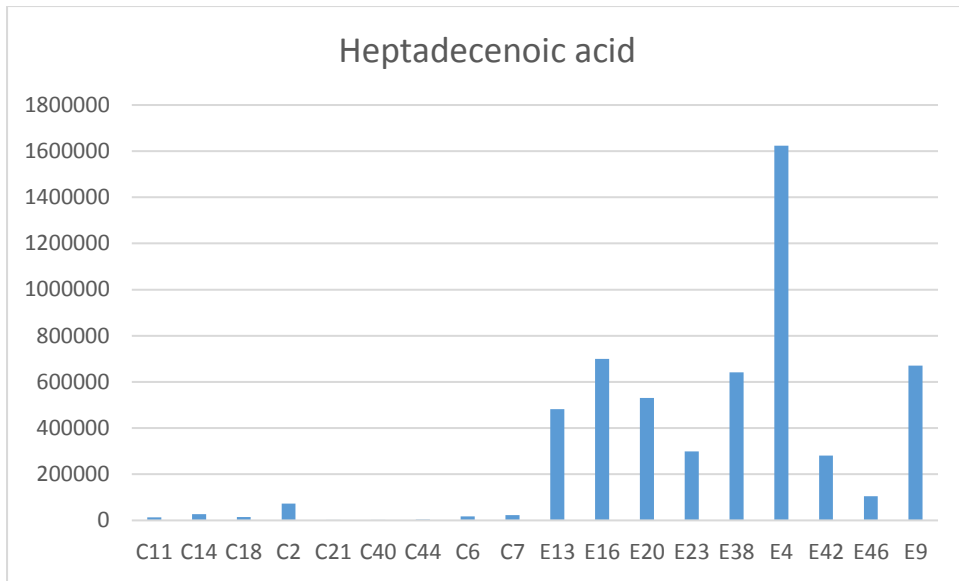

**Figure S16** Heptadecenoic acid in baseline and pre-80K samples

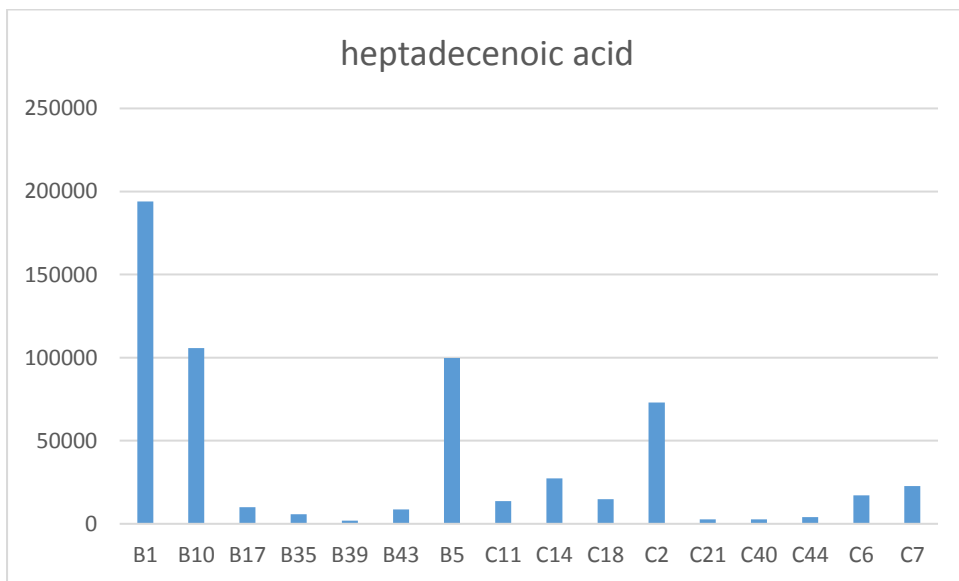

**Figure S17** Octatetraenoic acid in pre-80K and post-80K samples

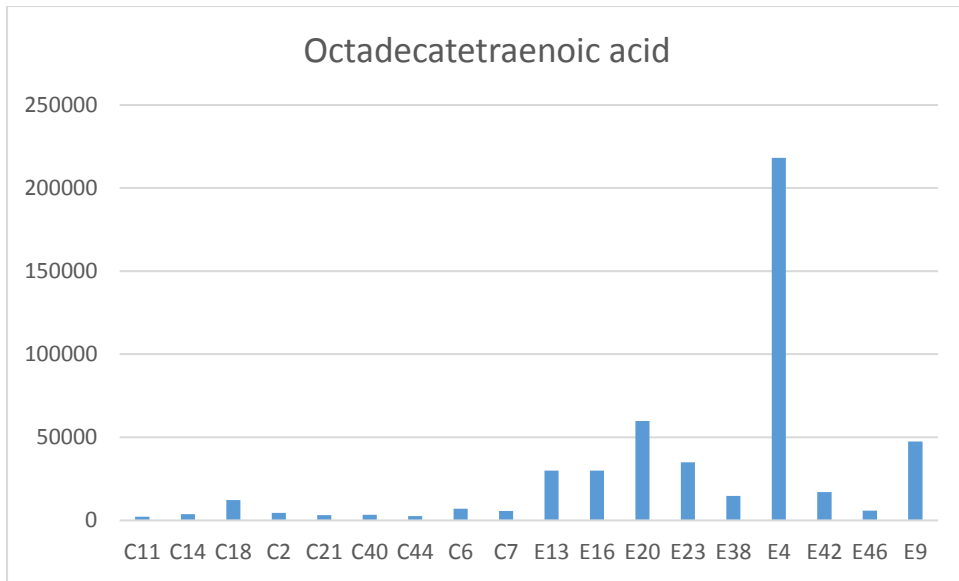

**Figure S18** Octatetraenoic acid in baseline and pre-80K samples

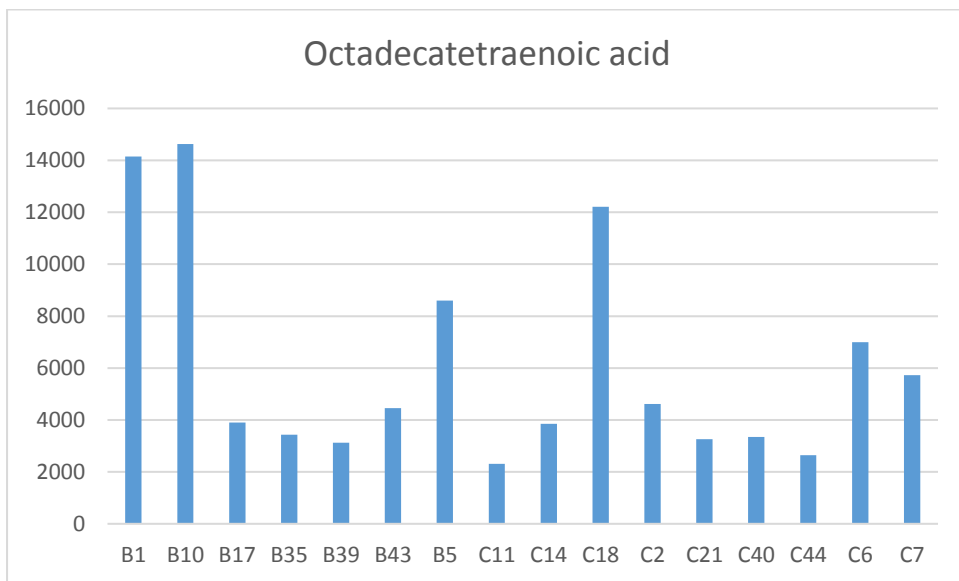



**Figure S19** Linoleic acid in pre-80K and post-80K samples

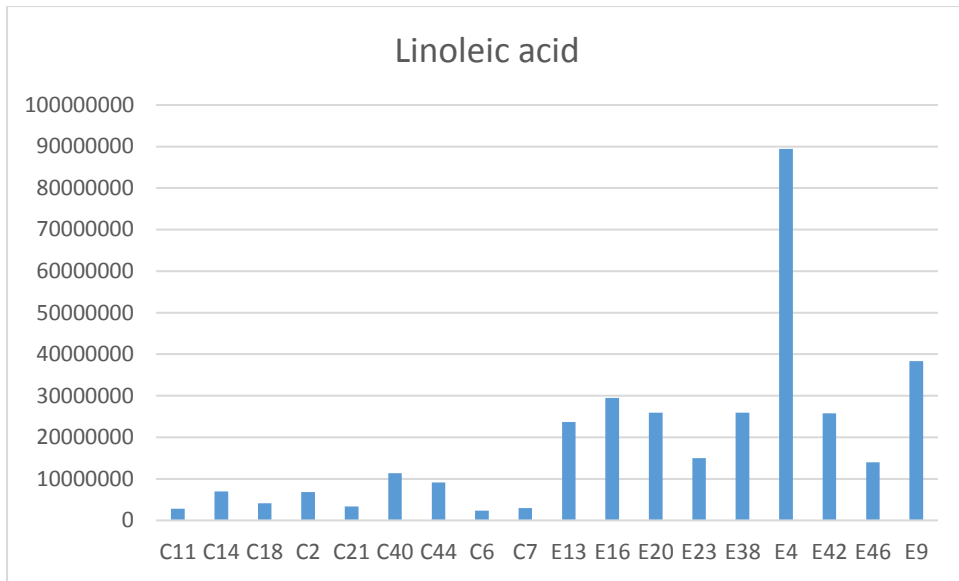

**Figure S20** Linoleic acid in baseline and pre-80K samples

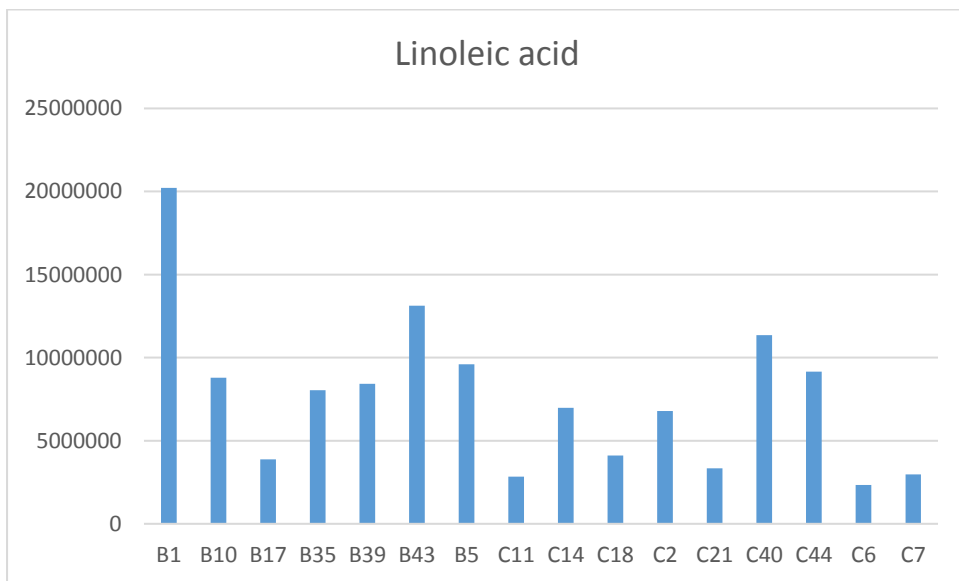

**Figure S21** Oleic acid in pre-80K and post-80K samples

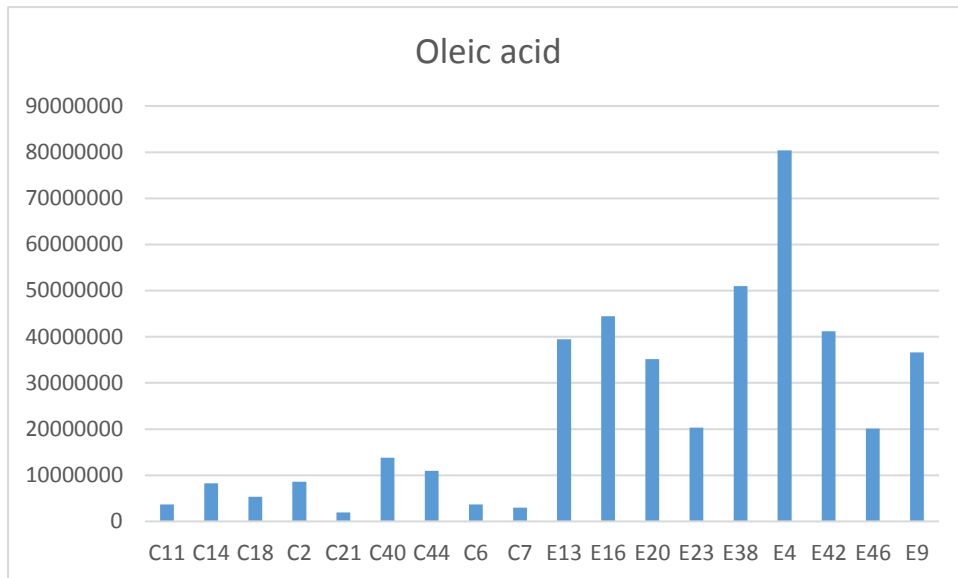

**Figure S22** Oleic acid in baseline and pre-80K samples

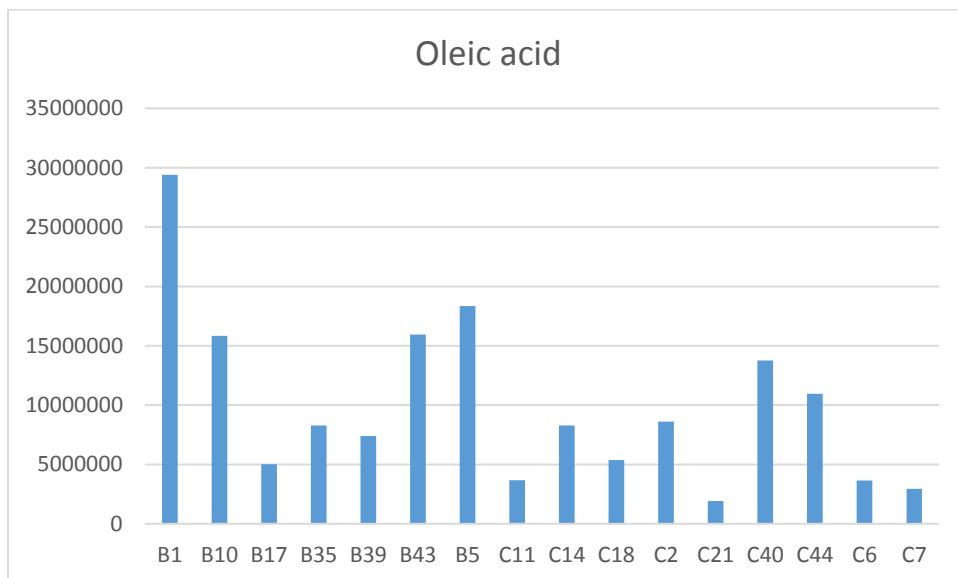

**Figure S23** Hydroxyoctadecadienoic acid in pre-80K and post-80K samples

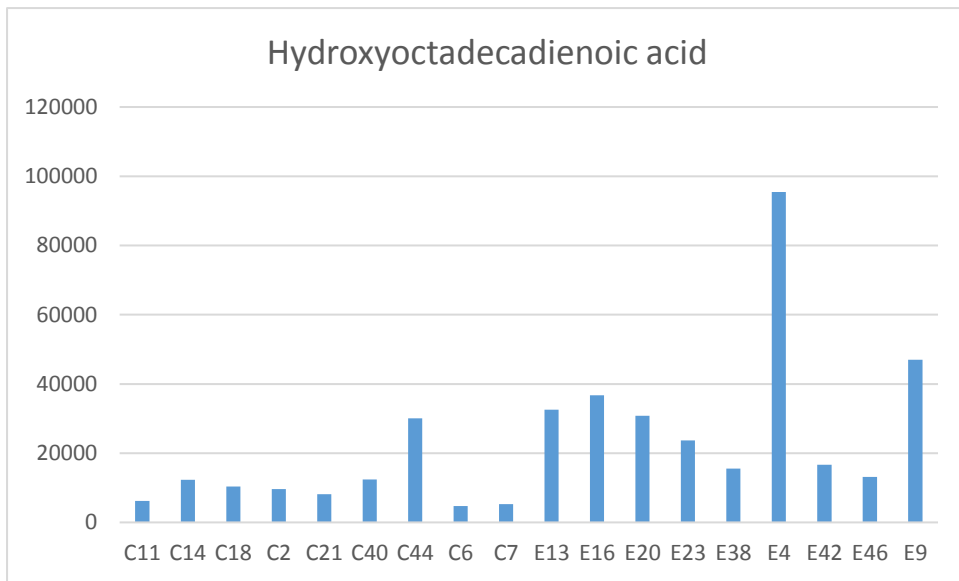

**Figure S24** Hydroxyoctadecadienoic acid in baseline and pre-80K samples

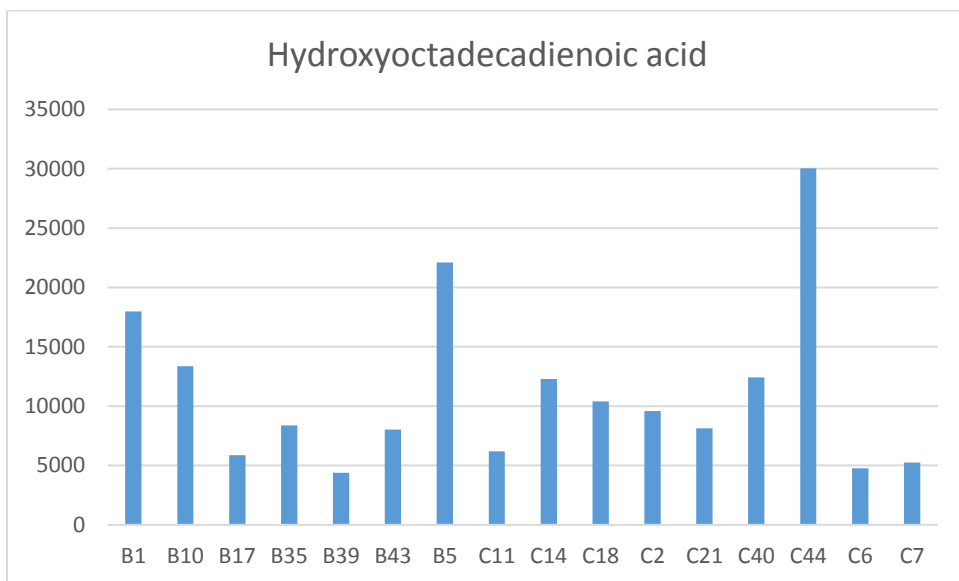

**Figure S25** Hydroxyoctadecadenoic acid in pre-80K and post-80K samples

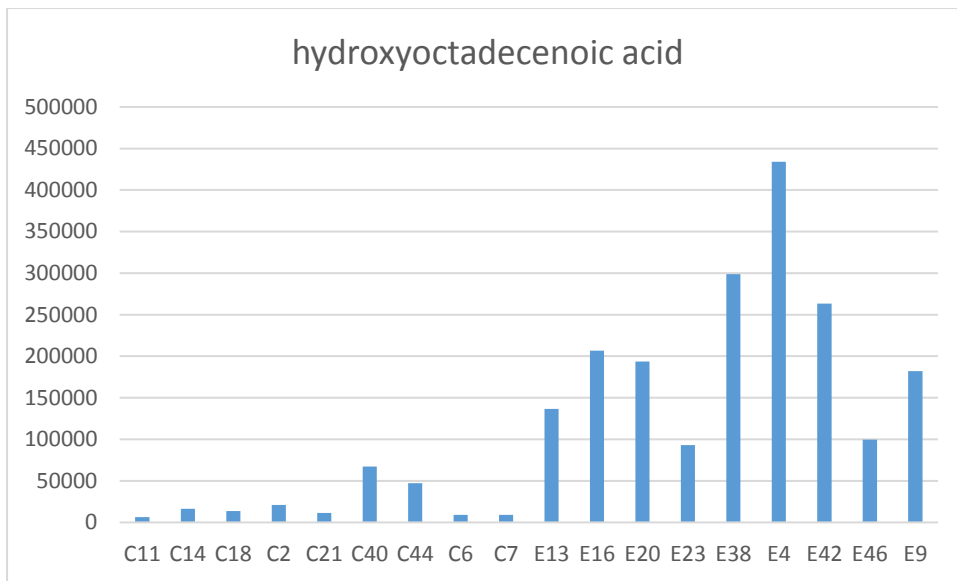

**Figure S26** Hydroxyoctadecenoic acid in baseline and pre-80K samples

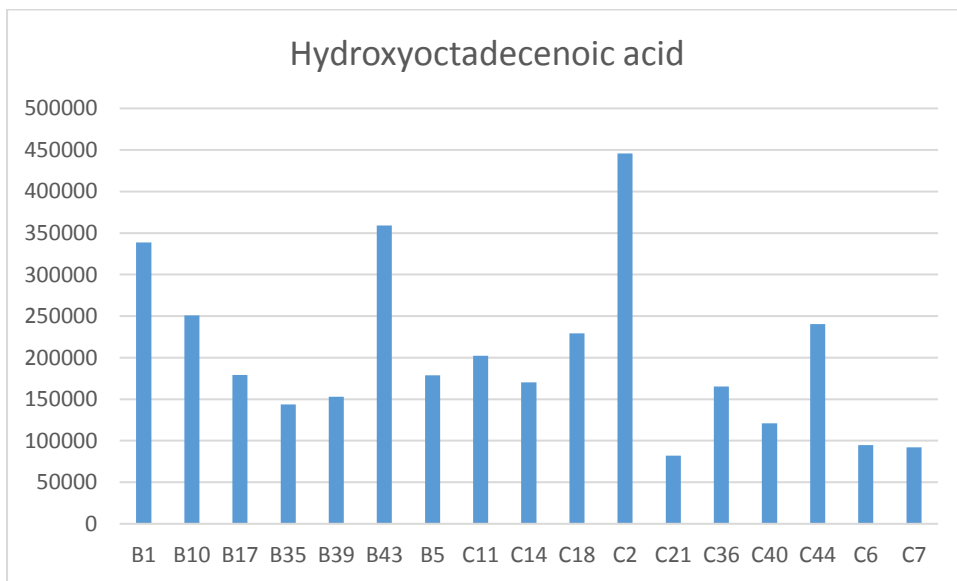

**Figure S27** Docosahexaenoic acid in pre-80K and post-80K samples

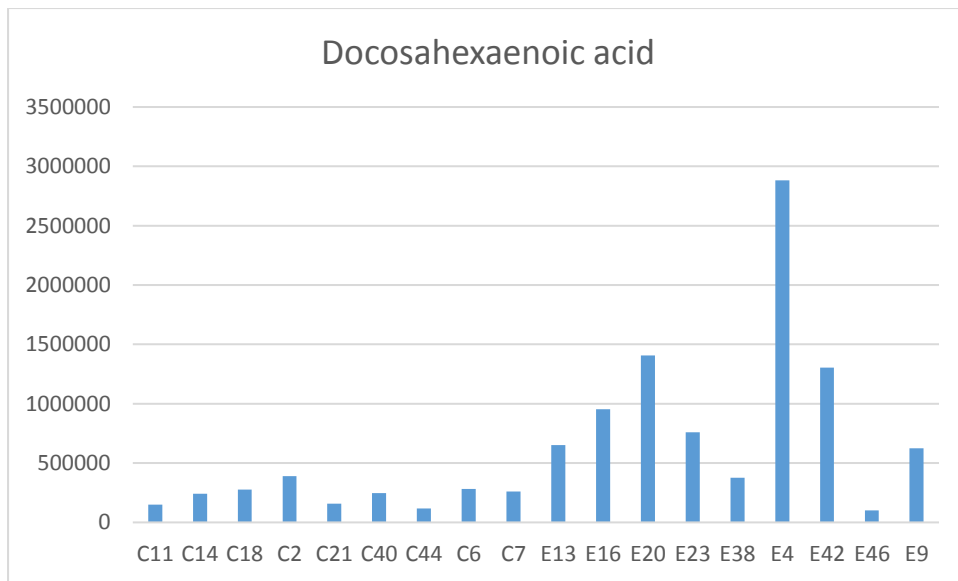

**Figure S28** Docosahexaenoic acid in baseline and pre-80K samples

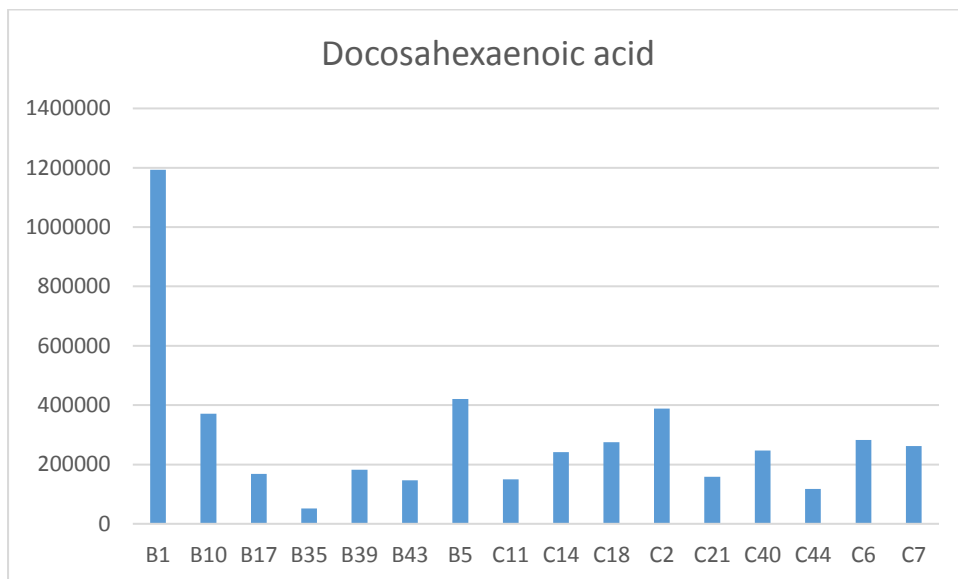

**Figure S29** Docosapentaenoic acid in pre-80K and post-80K samples

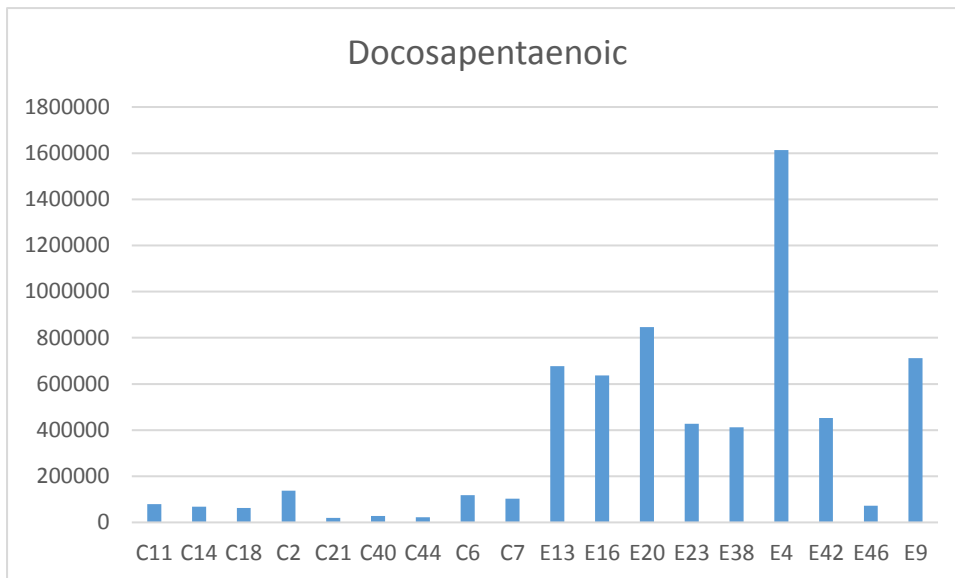

**Figure S30** Docosapentaenoic acid in baseline and pre-80K samples

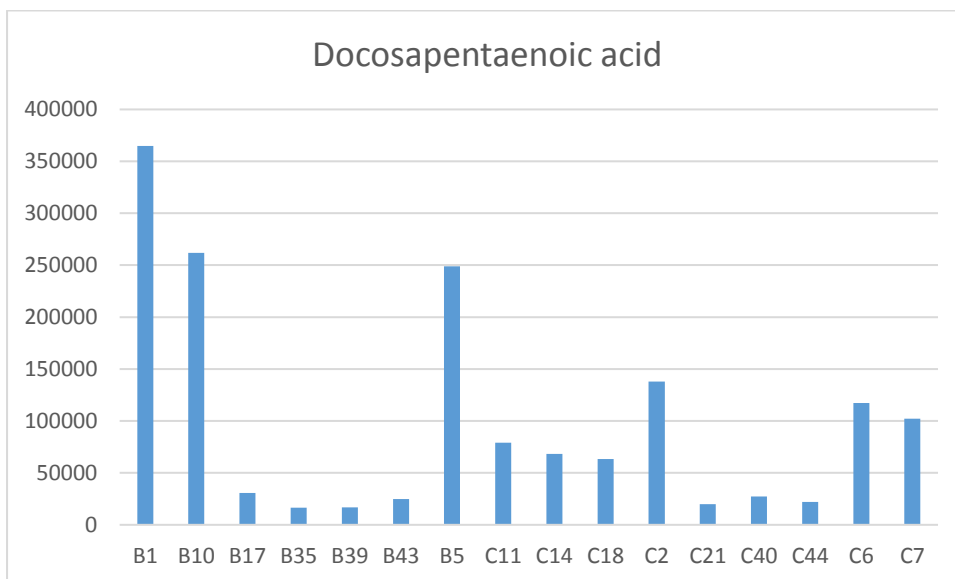

**Figure S31** Docosatetraenoic acid in pre-80K and post-80K samples

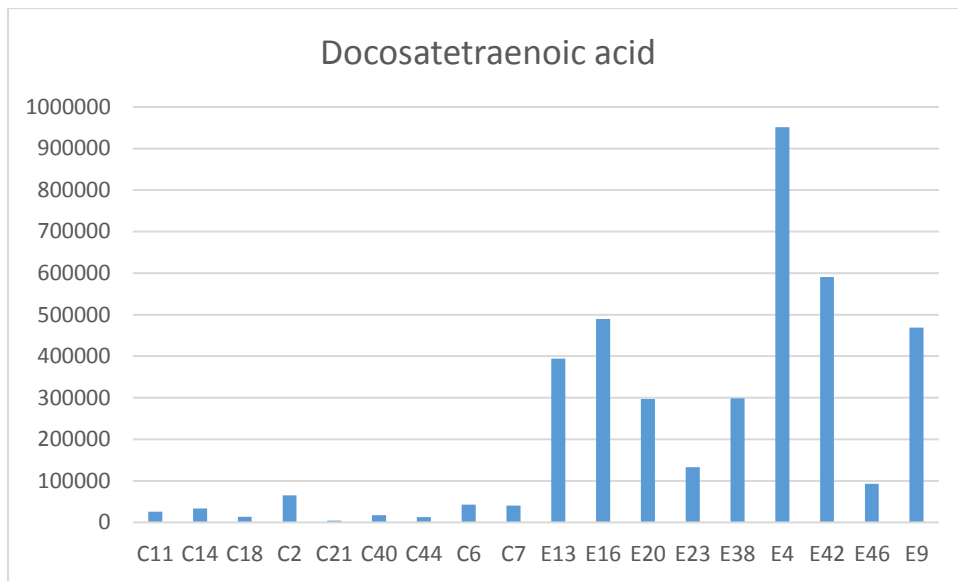

**Figure S32** Docosatetraenoic acid in baseline and pre-80K samples

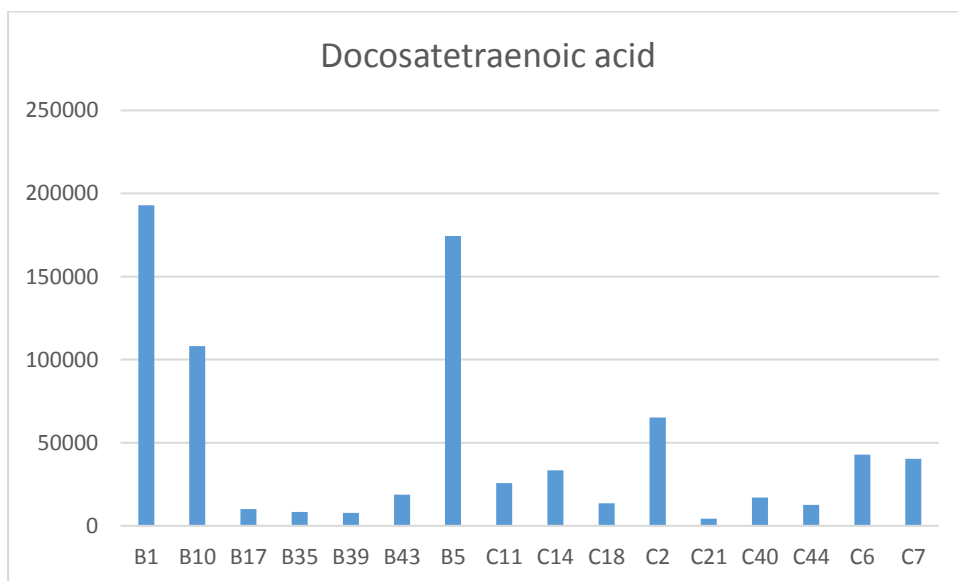

**Figure S33** Dihydroxyoctadecenoic acid

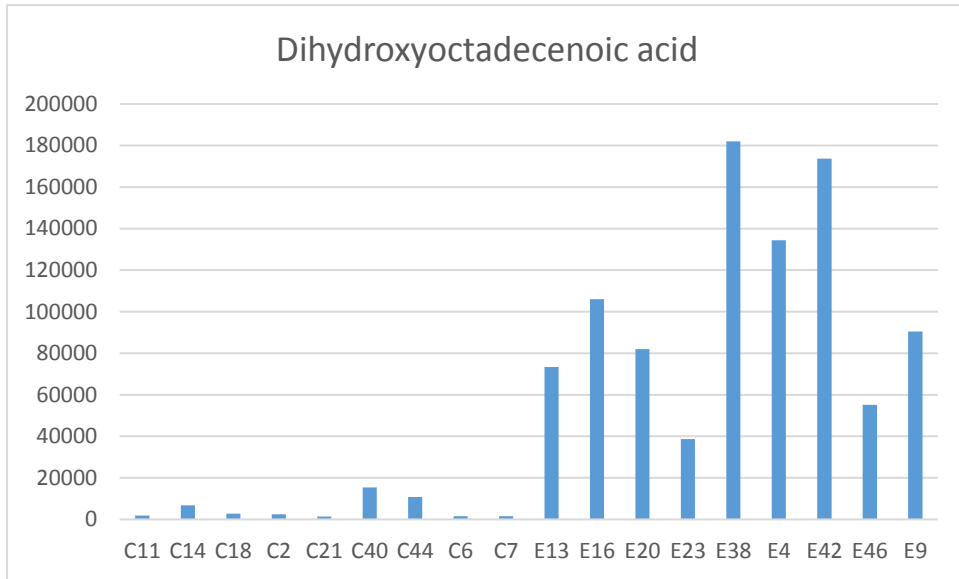

**Figure S34** Dihydroxyoctadecenoic acid in baseline and pre-80K samples

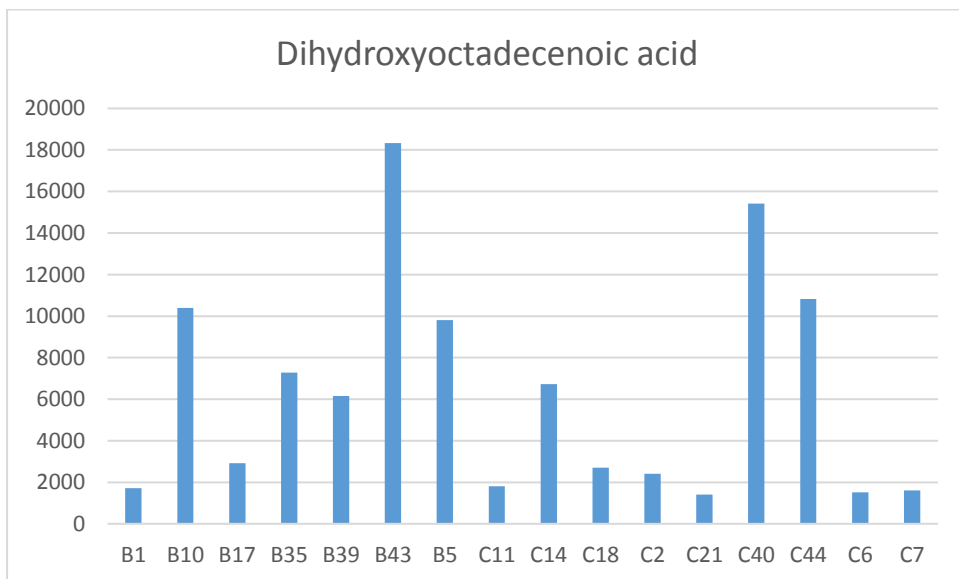



**Figure S35** Acetylcarnitine in pre-80K and post-80K samples

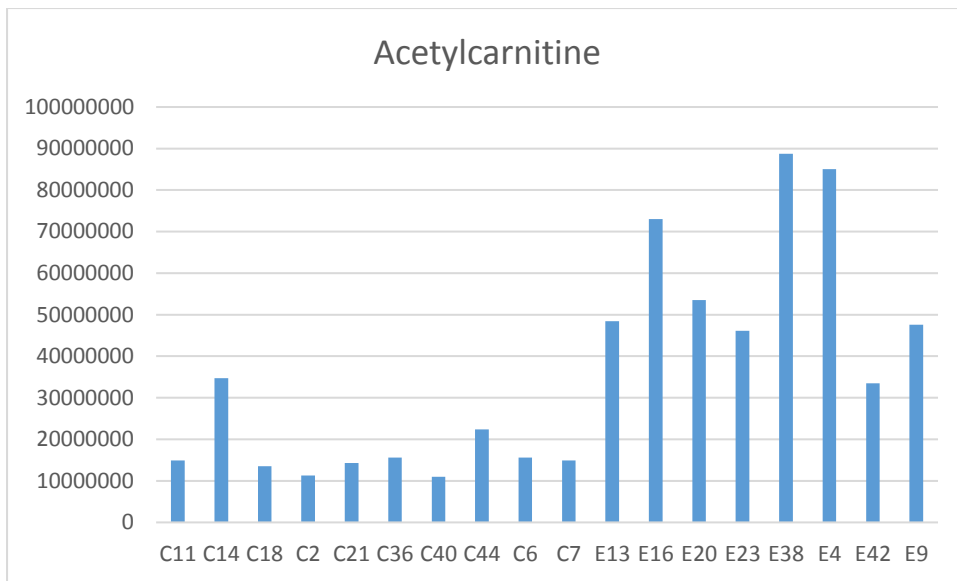

**Figure S36** Acetylcarnitine in baseline and pre-80K samples

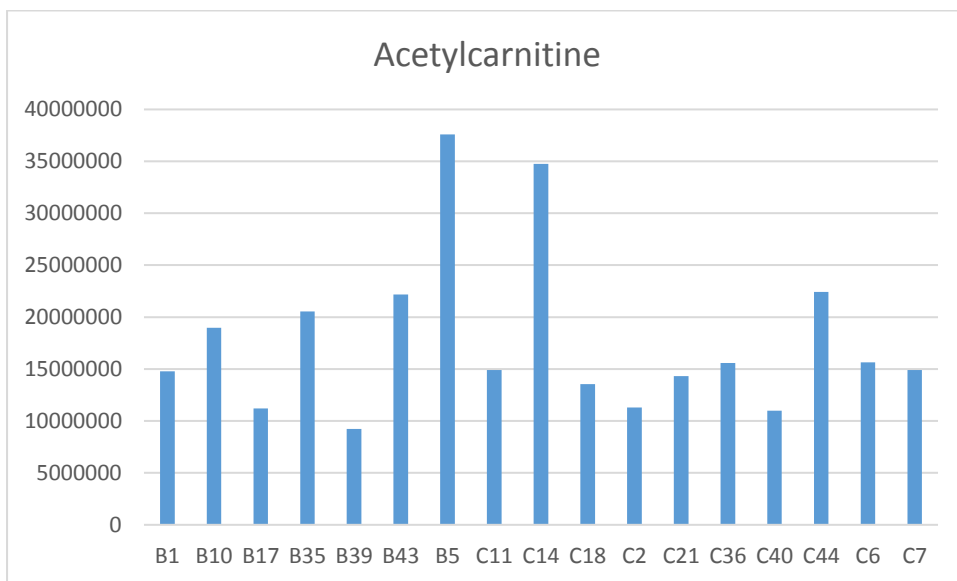

**Figure S37** Octenoylcarnitine in pre-80K and post-80K samples

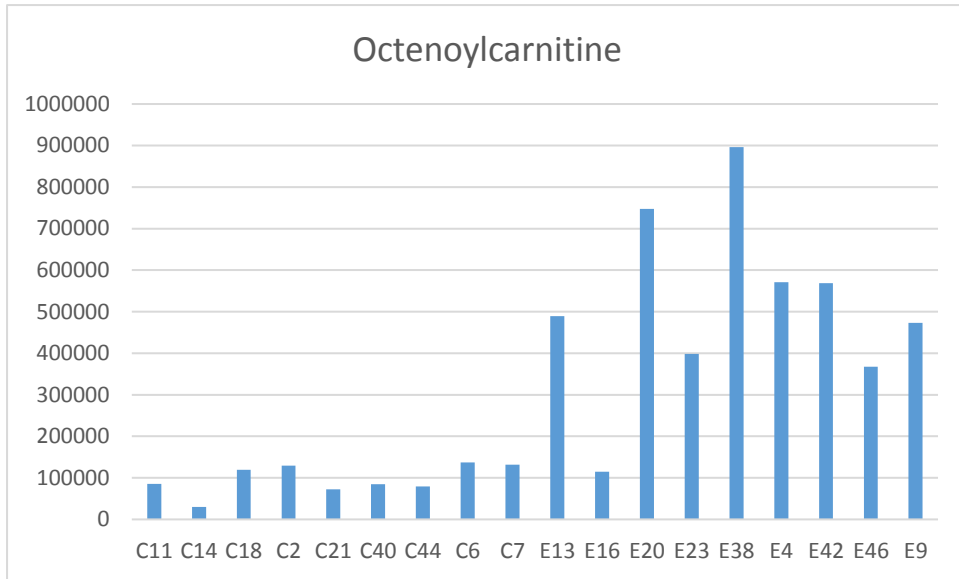

**Figure S38** Octenoylcarnitine in baseline and pre-80K samples

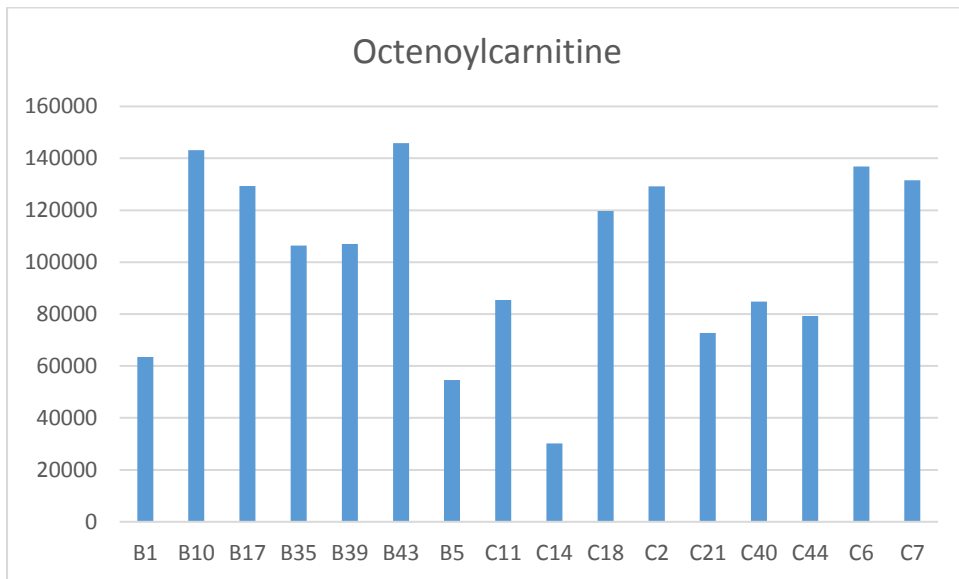

**Figure S39** Octanoylcarnitine in pre-80K and post-80K samples

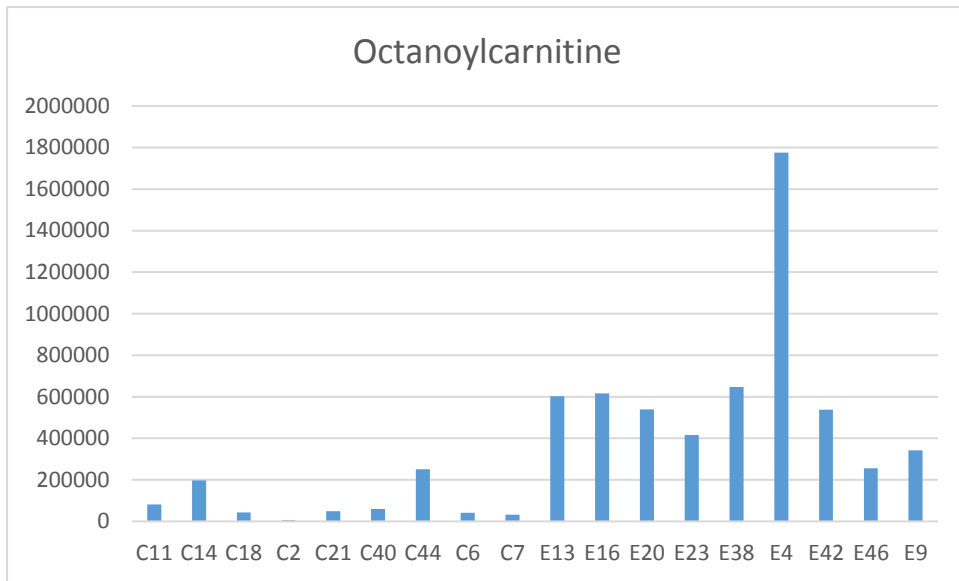

**Figure S40** Octanoylcarnitine in baseline and pre-80K samples

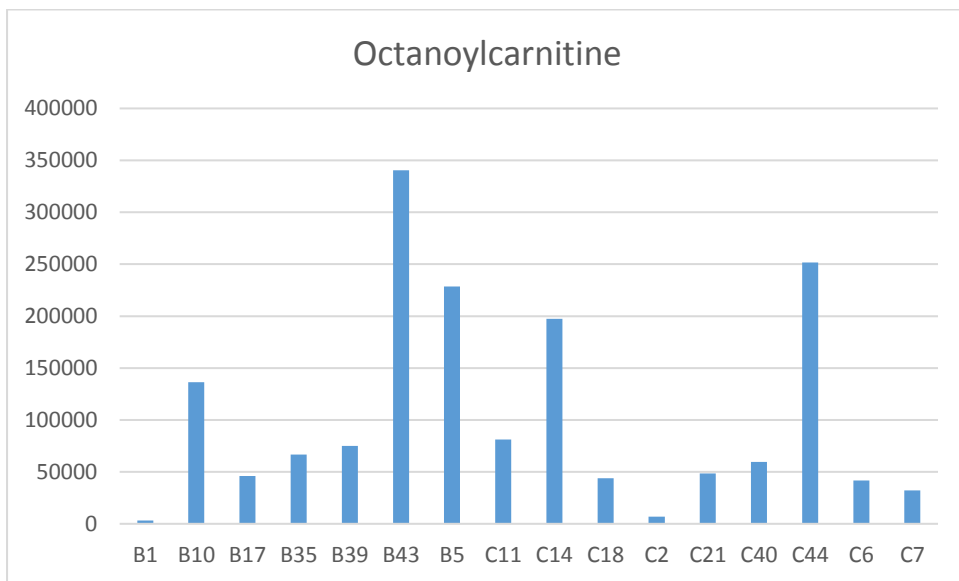

**Figure S41** Nonanoylcarnitine in pre-80K and post-80K samples

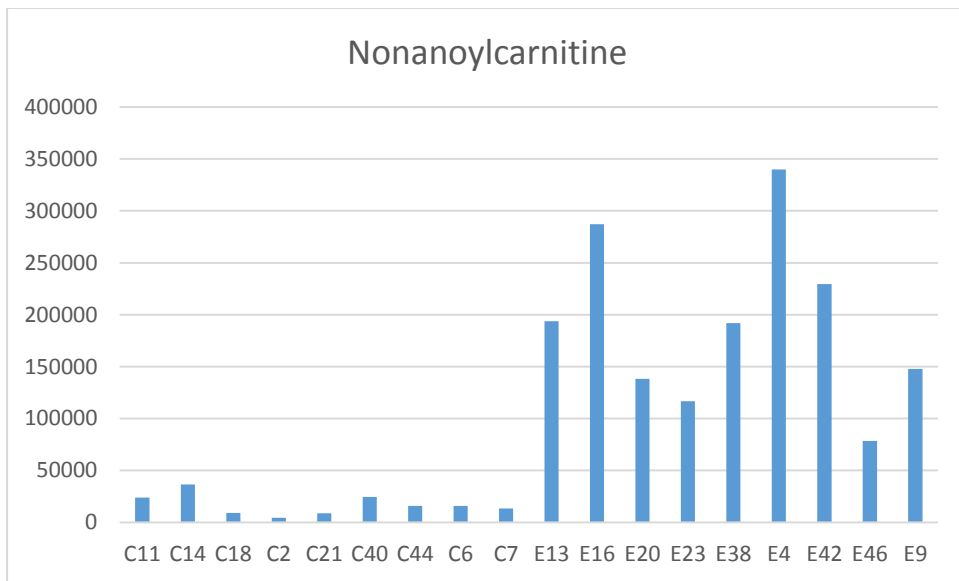

**Figure S42** Nonanoylcarnitine in baseline and pre-80K samples

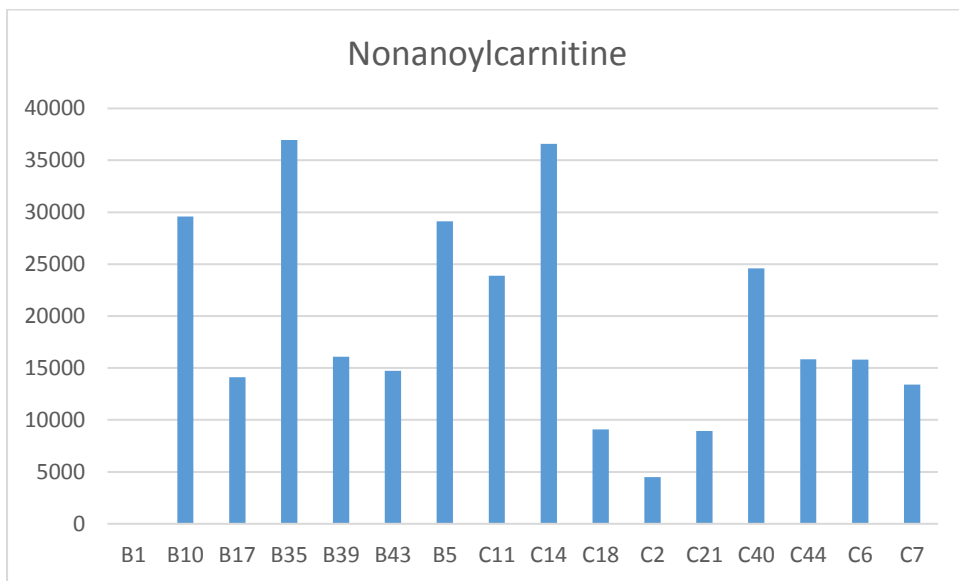

**Figure S43** Decadienoylcarnitine in pre-80K and post-80K samples

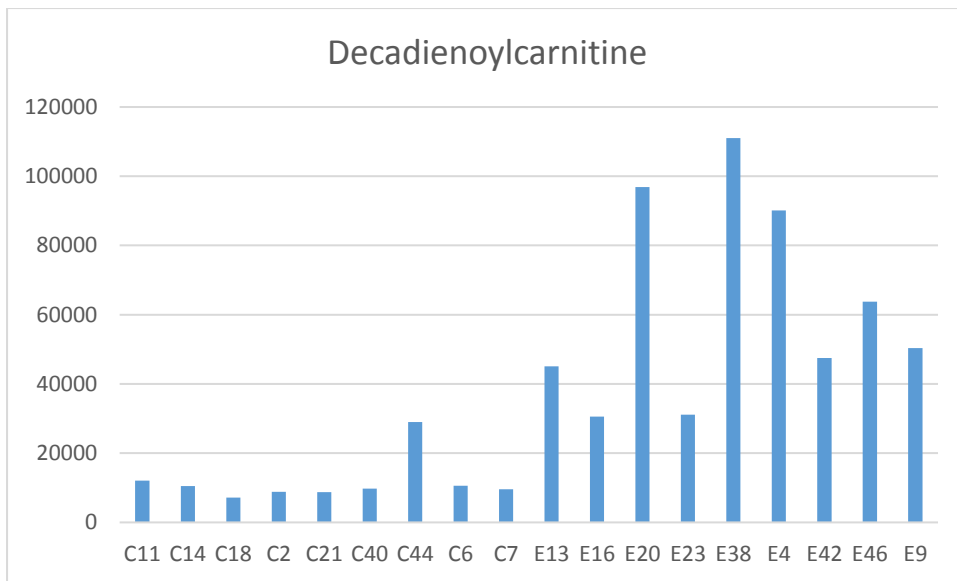

**Figure S44** Decadienoylcarnitine in baseline and pre-80K samples

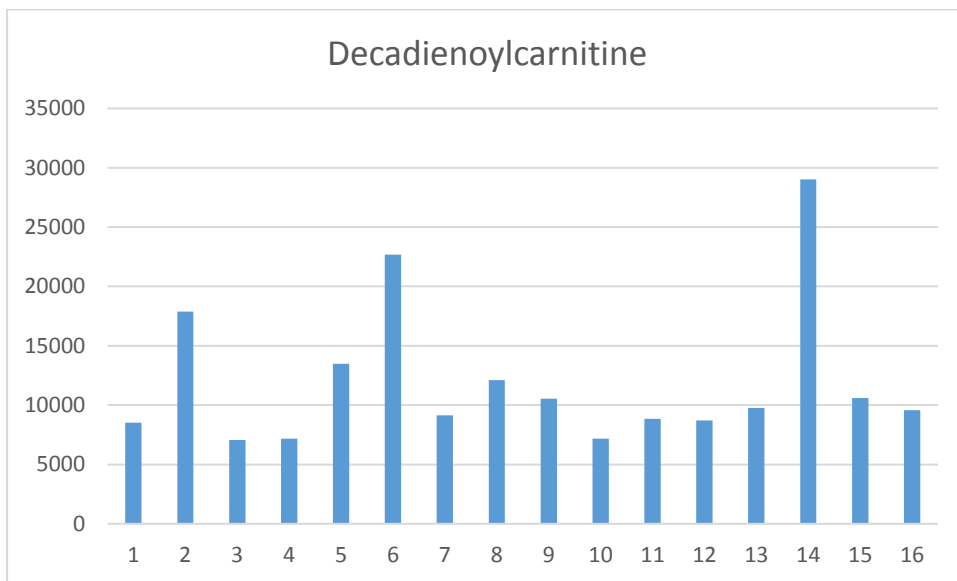

**Figure S45** Decenoylcarnitine in pre-80K and post-80K samples

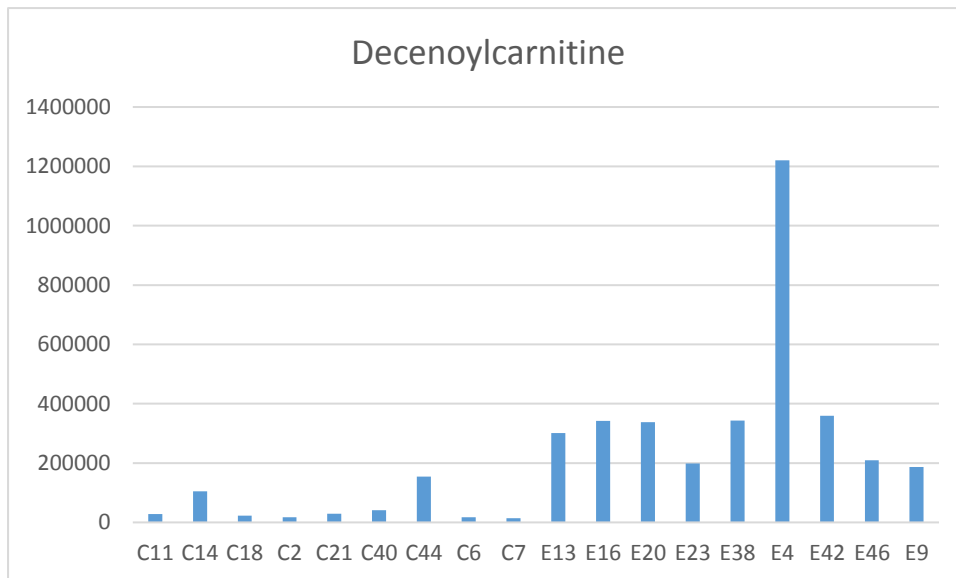

**Figure S46** Decenoylcarnitine in baseline and pre-80K samples

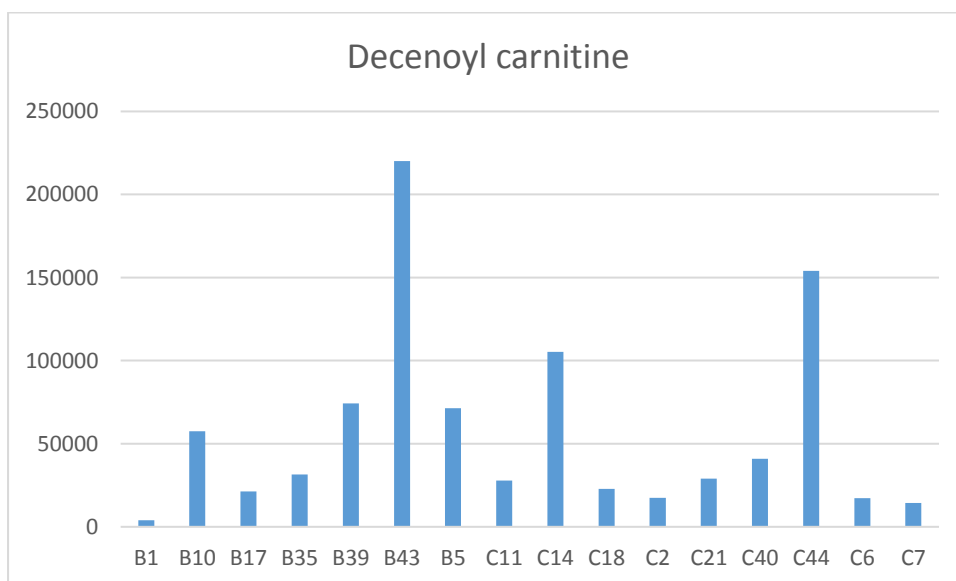

**Figure S47** Decanoylcarnitine in pre-80K and post-80K samples

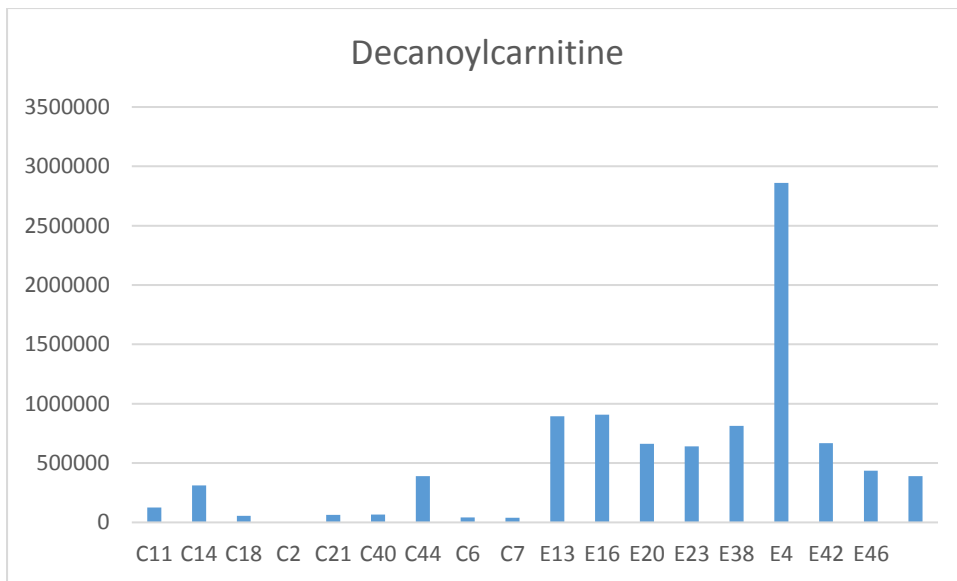

**Figure S48** Decanoylcarnitine in baseline and pre-80K samples

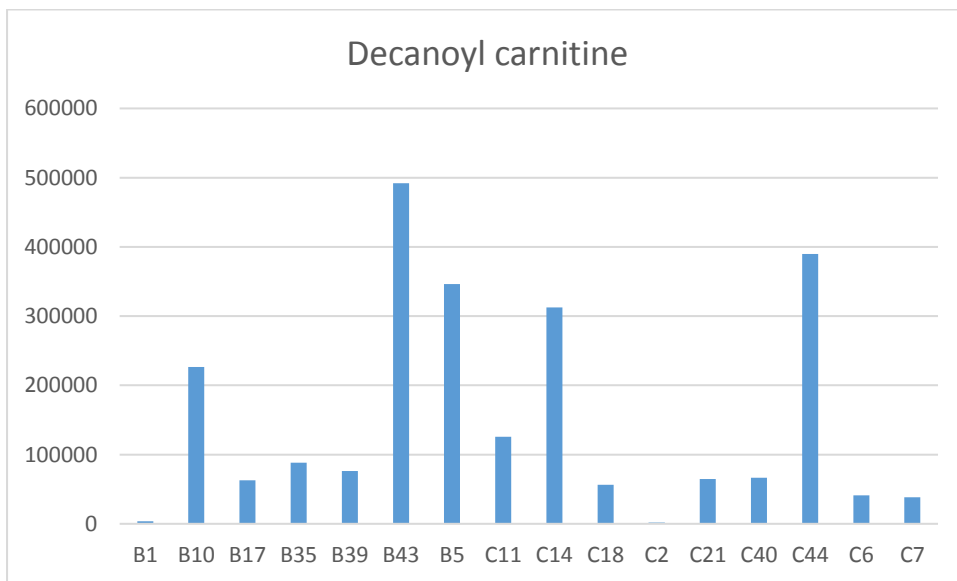

**Figure S49** Dodecanoylcarnitine in pre-80K and post-80K samples

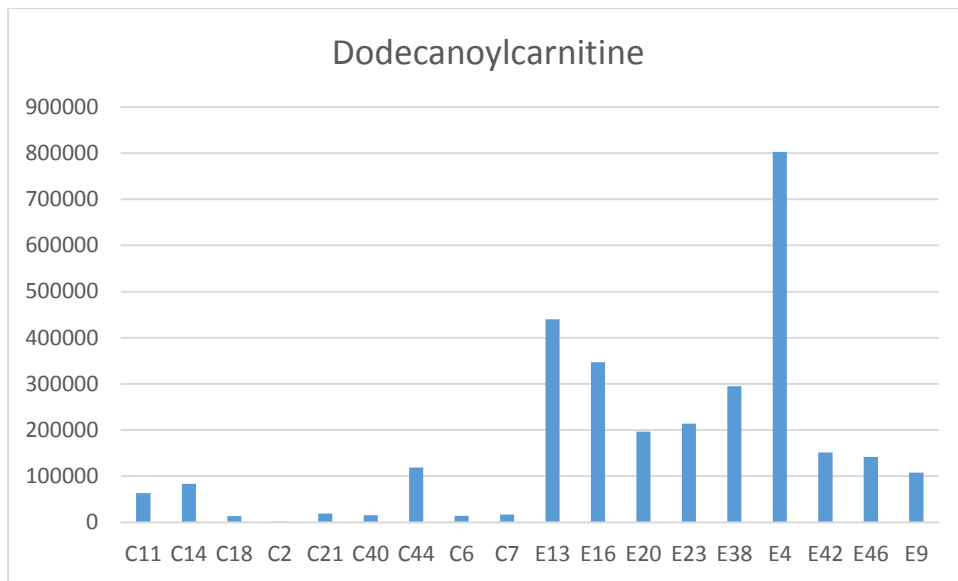

**Figure S50** Dodecanoylcarnitine in baseline and pre-80K samples

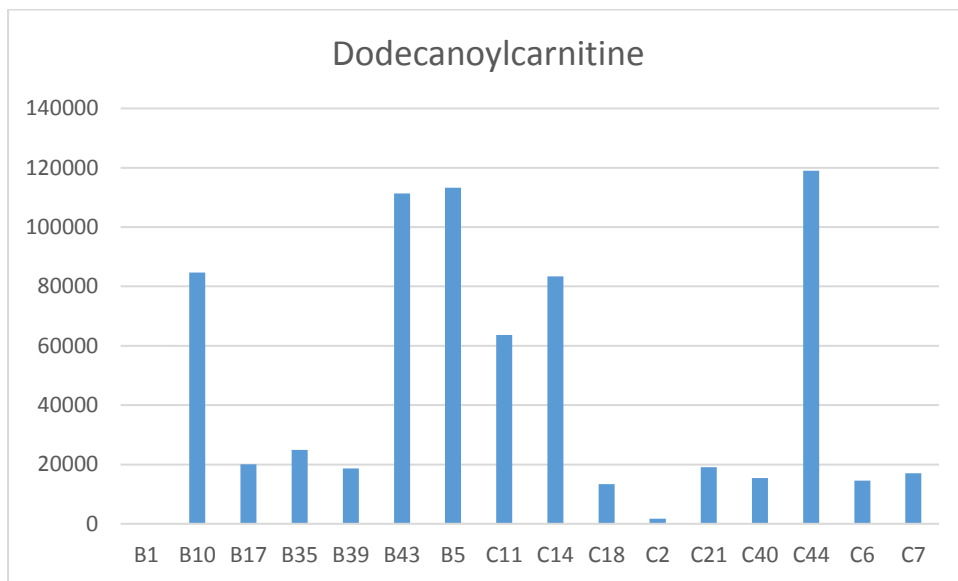



**Figure S51** Tetradecenoylcarnitine in pre-80K and post-80K samples.

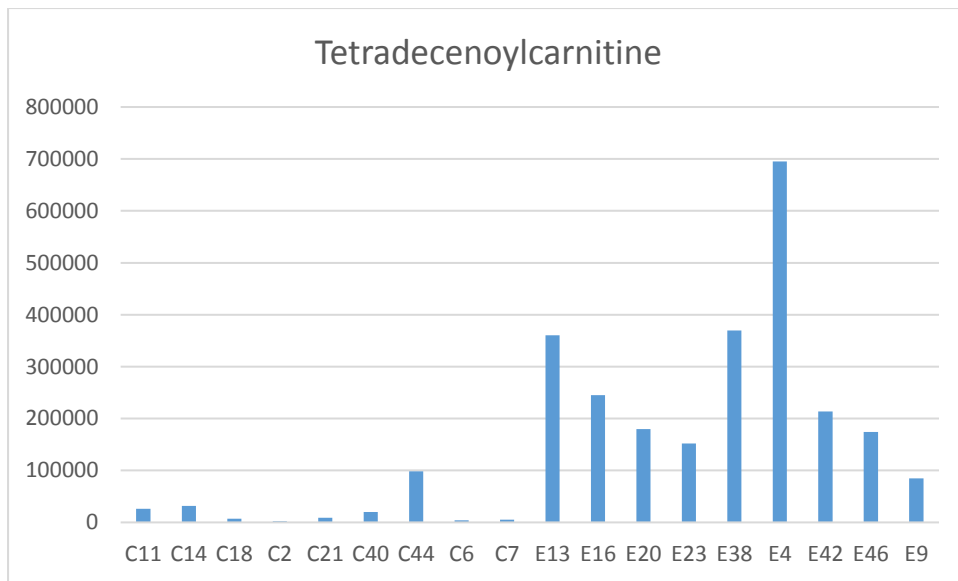

**Figure S52** Tetradecenoylcarnitine in baseline and pre-80K samples

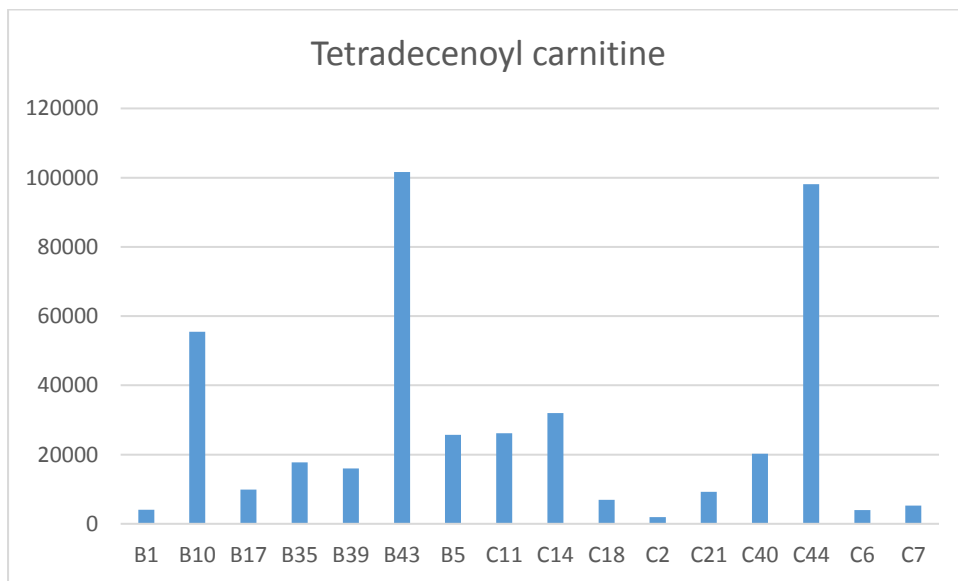

**Figure S53** Palmitoylcarnitine in pre-80K and post-80K samples

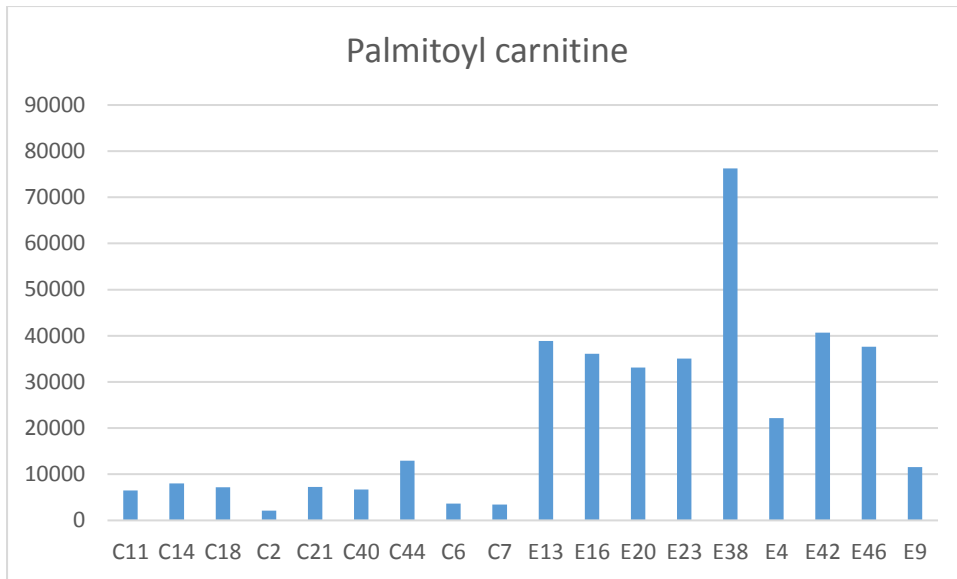

**Figure S54** Palmitoylcarnitine in baseline and pre-80K samples

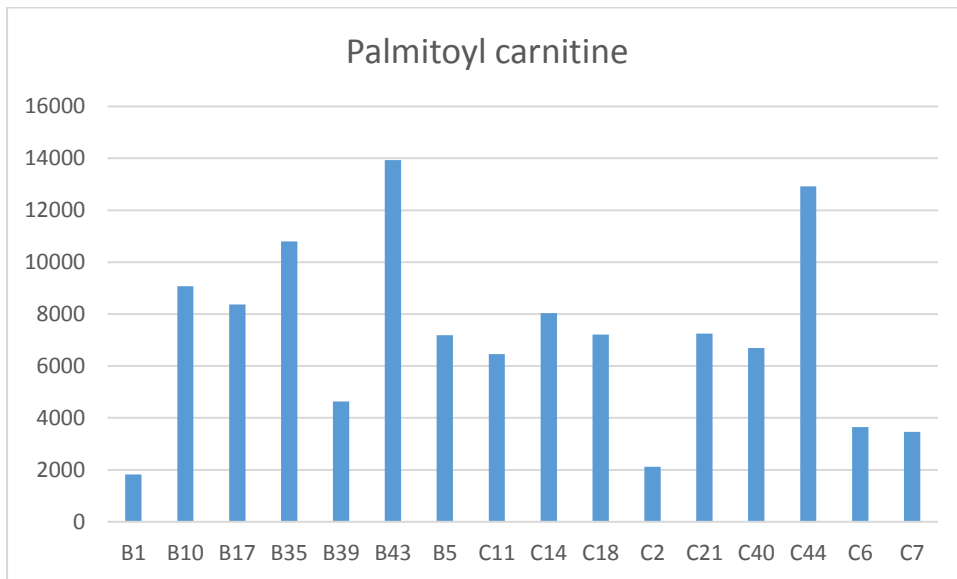

**Figure S55** Proline in pre-80K and post-80K samples

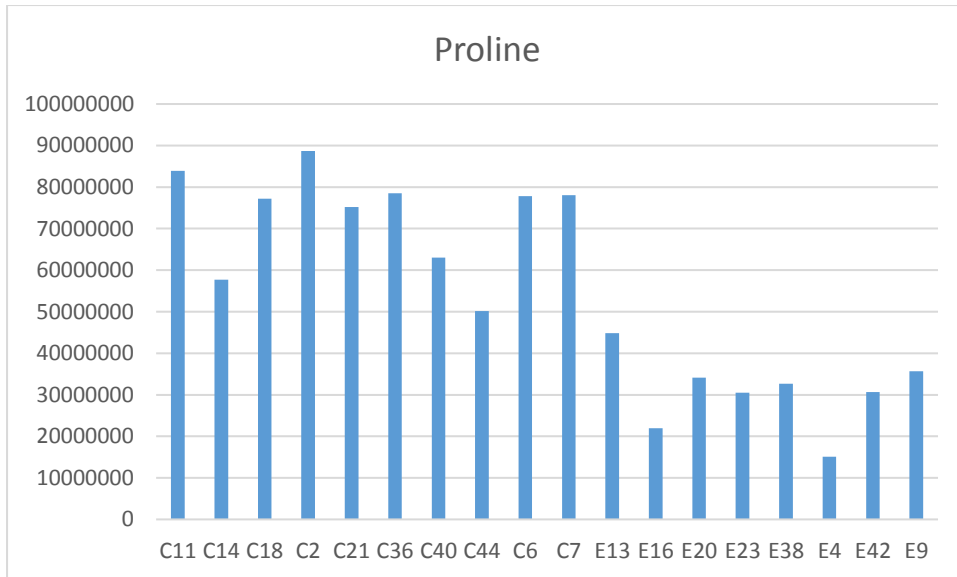

**Figure S56** Proline in baseline and pre-80K samples

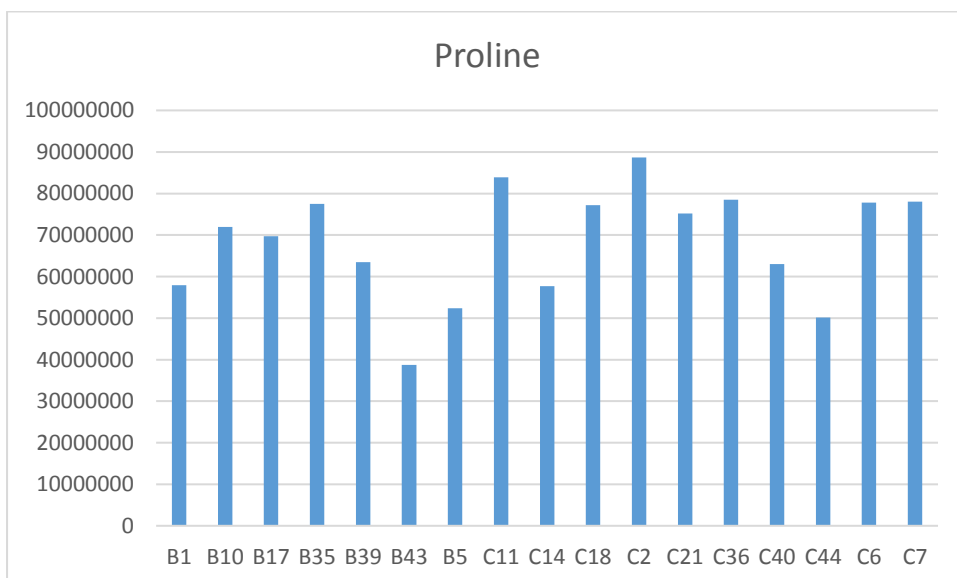

**Figure S57** Valine in pre-80K and post-80K samples

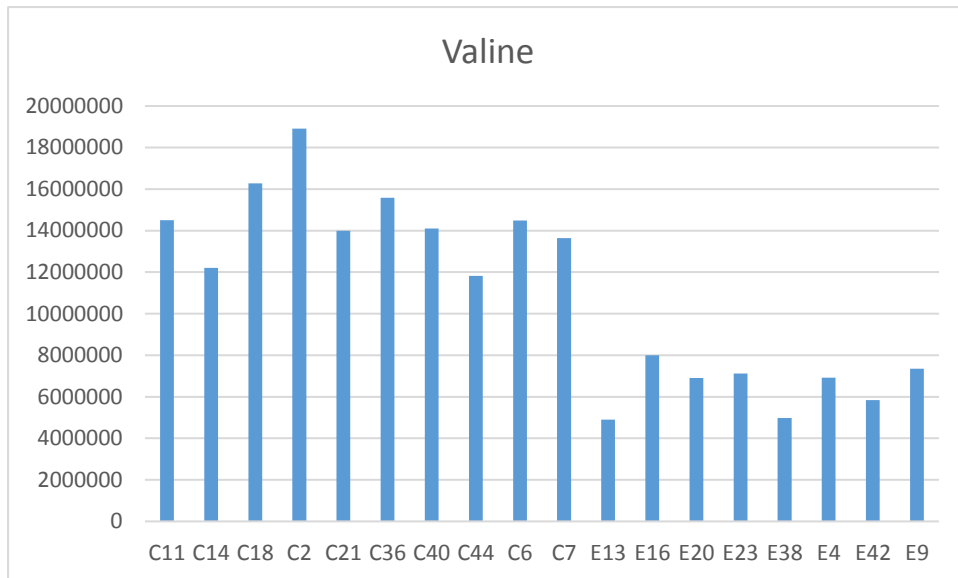

**Figure S58** Valine in baseline and pre-80K samples

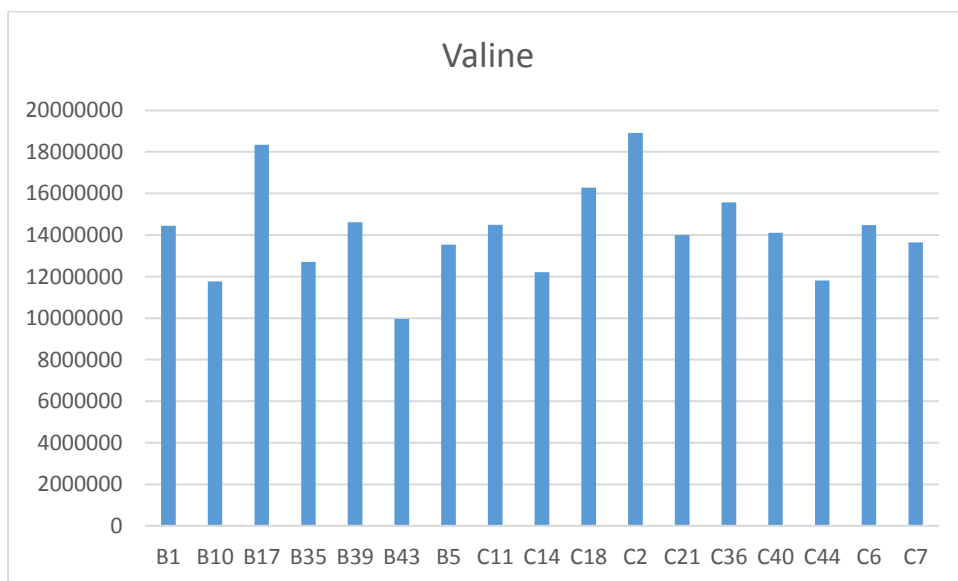

**Figure S59** Betaine in pre-80K and post-80K samples

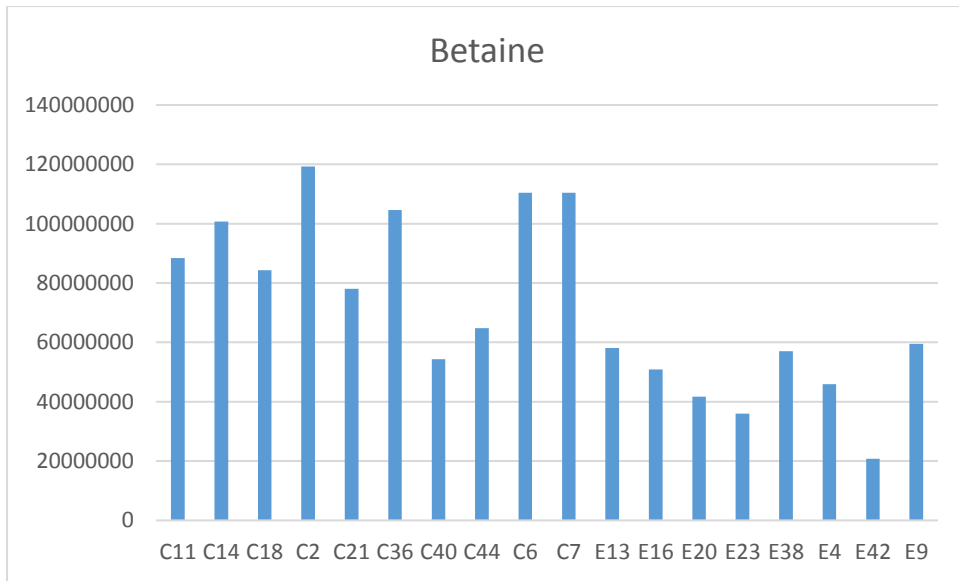

**Figure S60** Betaine in baseline and pre-80K samples

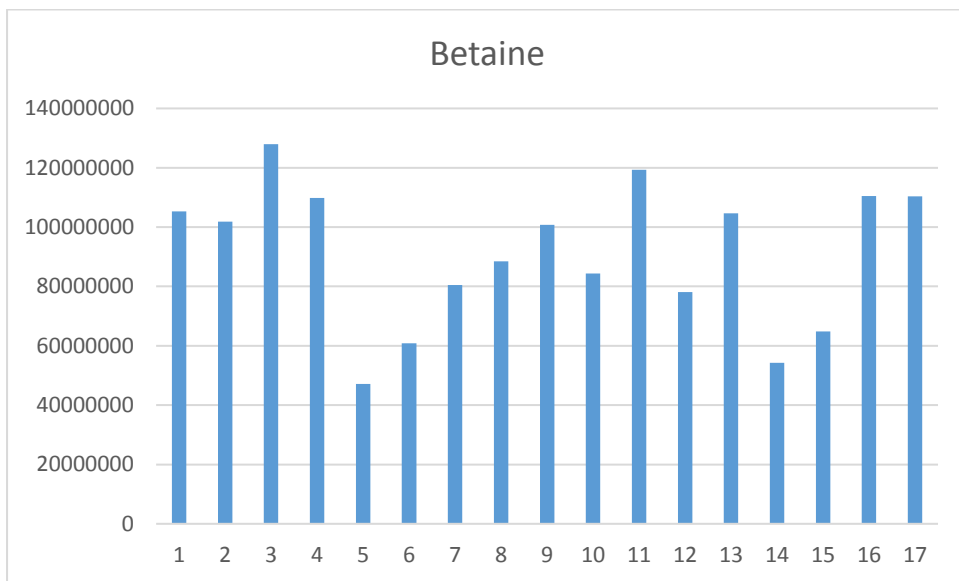

**Figure S61** Leucine in pre-80K and post-80K samples

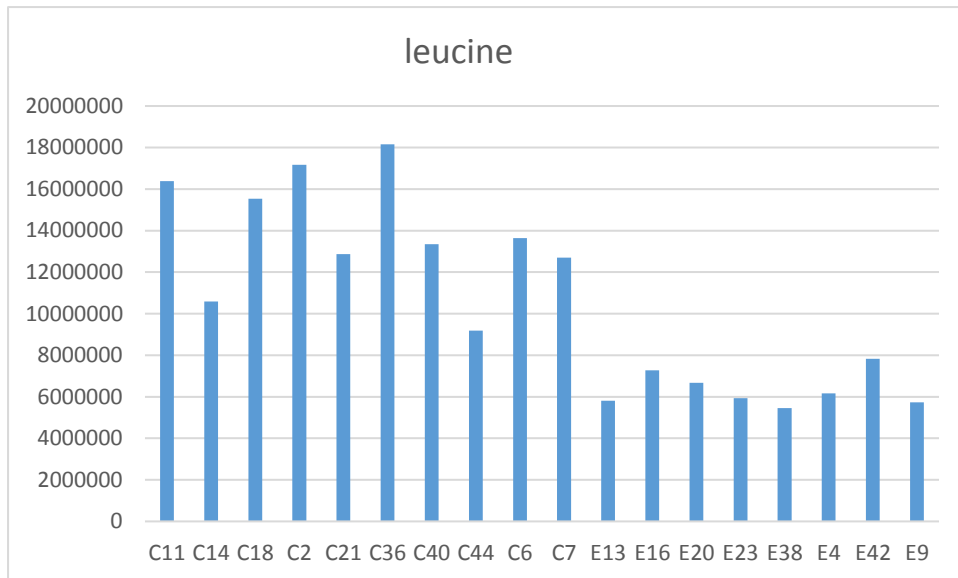

**Figure S62** Leucine in baseline and pre-80K samples

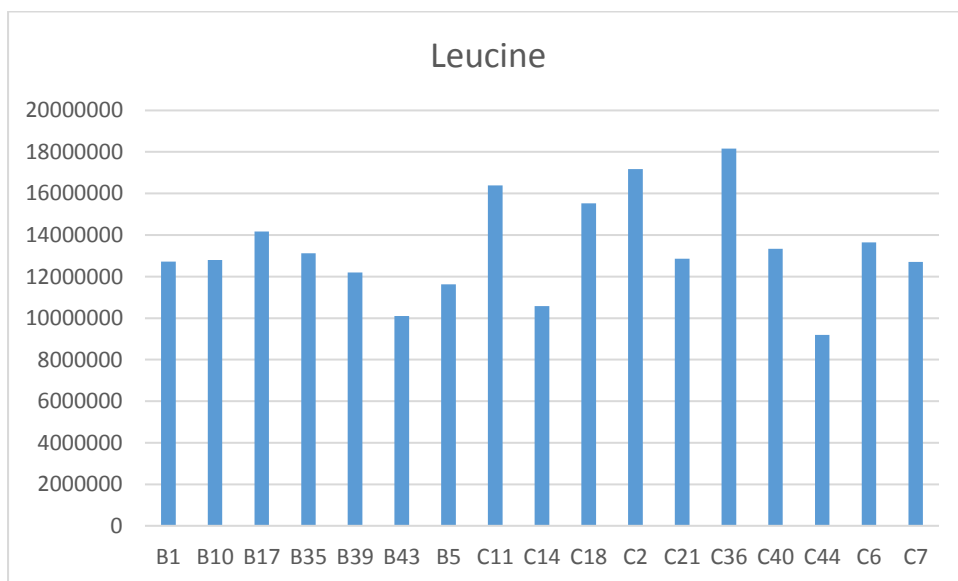

**Figure S63** Isoleucine in pre-80K and post-80K samples

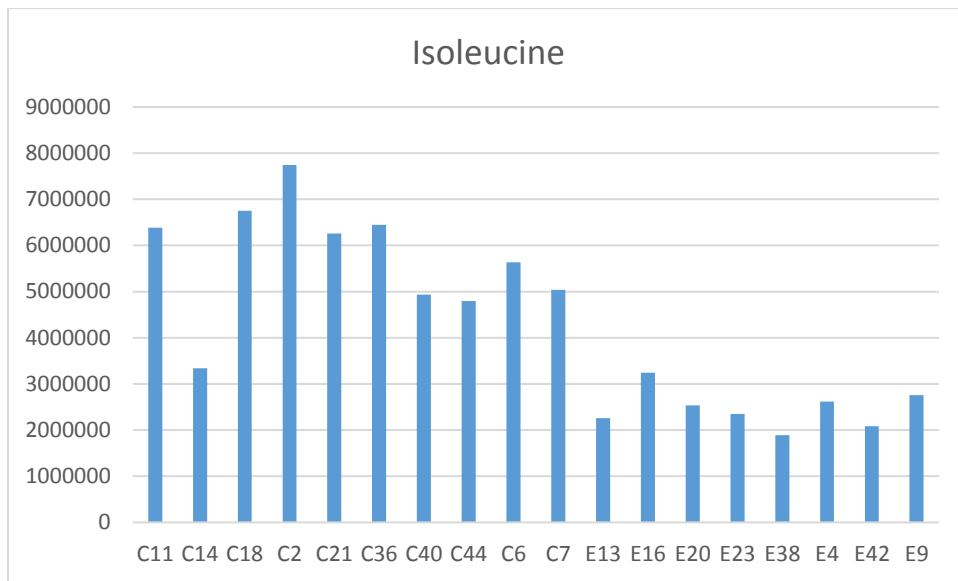

**Figure S64** Isoleucine in baseline and pre-80K samples

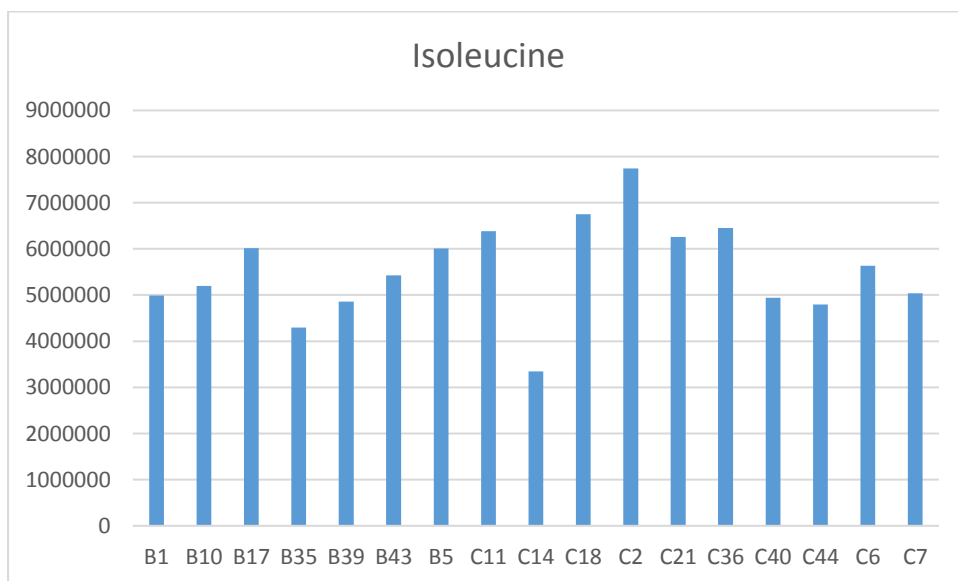

**Figure S65** Tryptophan in pre-80K and post-80K samples

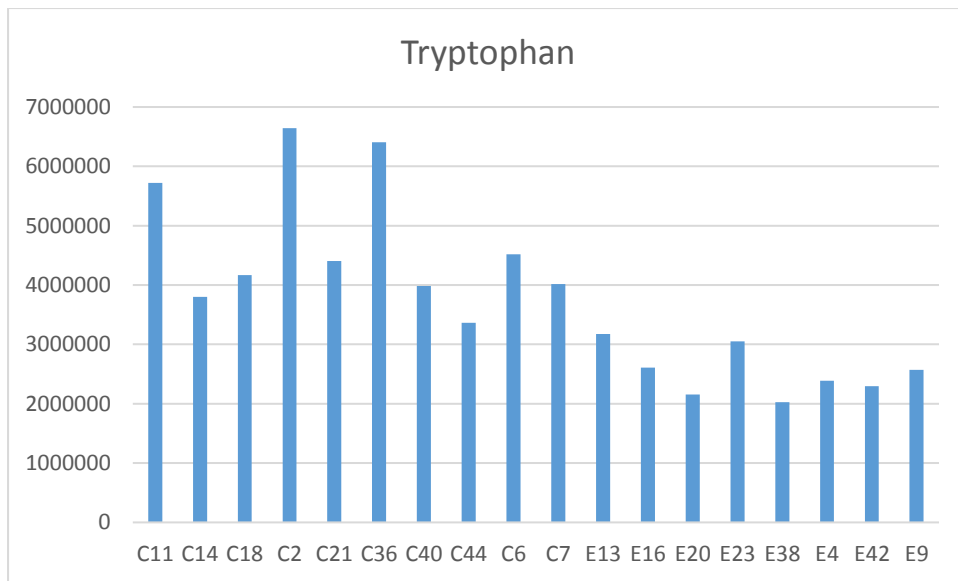

**Figure S66** Tryptophan in baseline and pre-80K samples

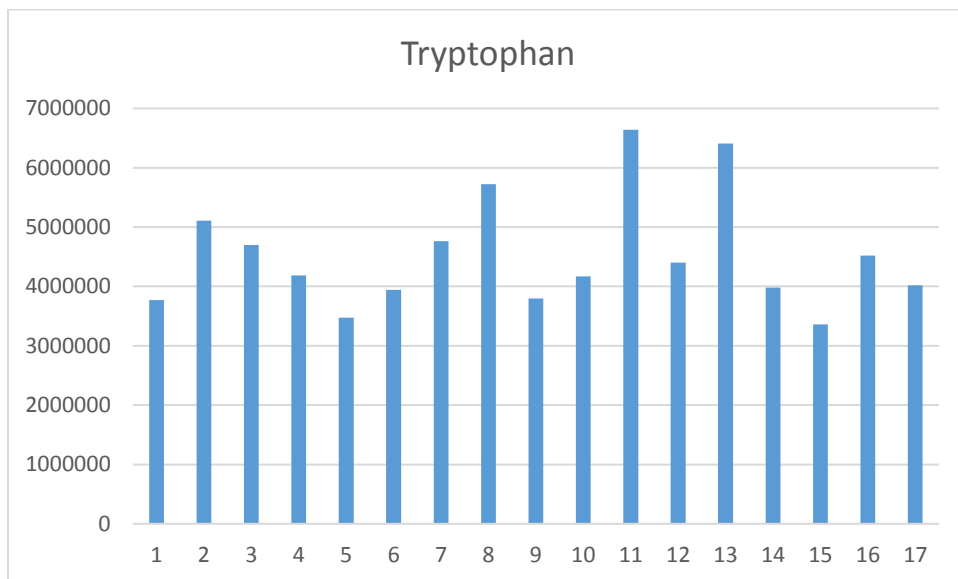



**Figure S67** Hydrocortisone in pre-80K and post-80K samples

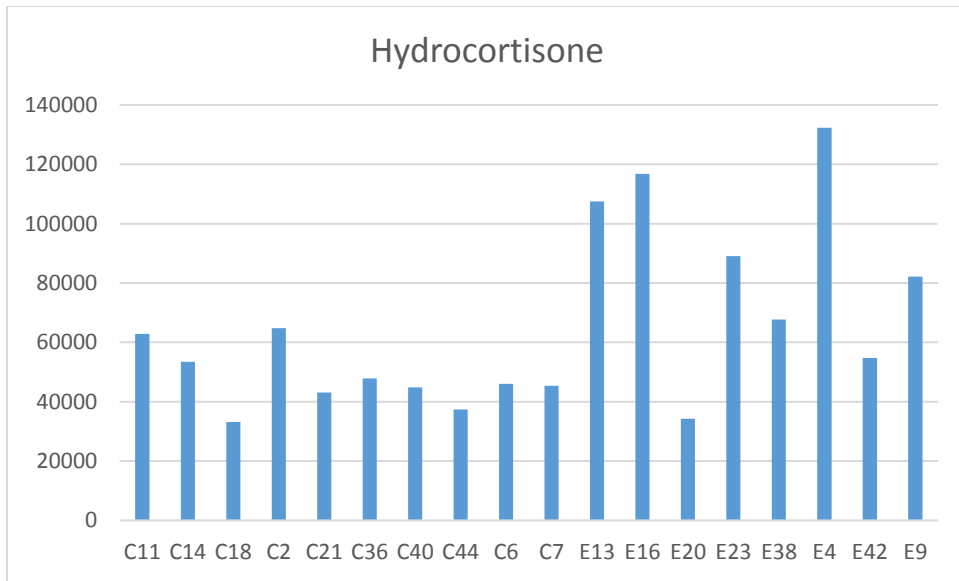

**Figure S68** Hydrocortisone in baseline and pre-80K samples

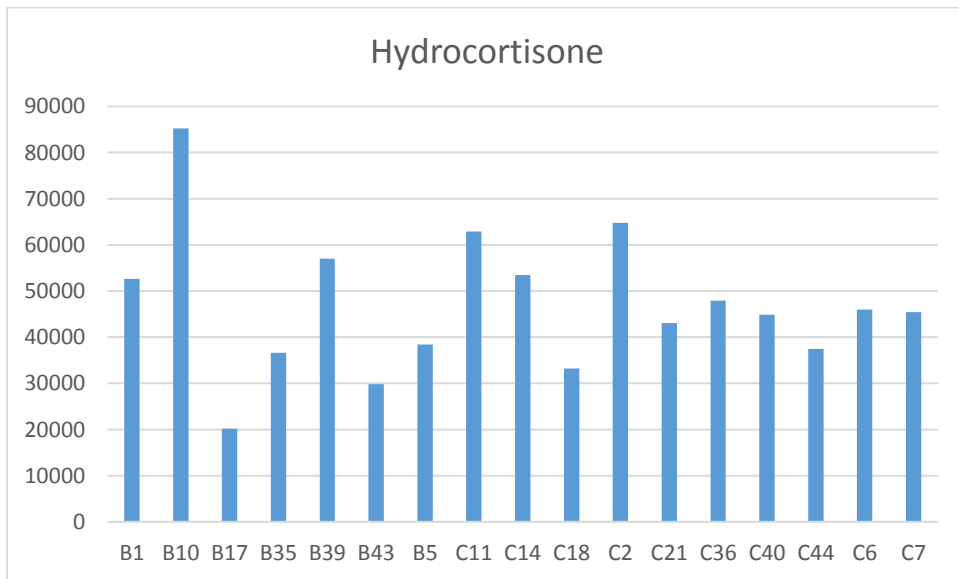

**Figure S69** Urocortone in pre-80K and post-80K samples

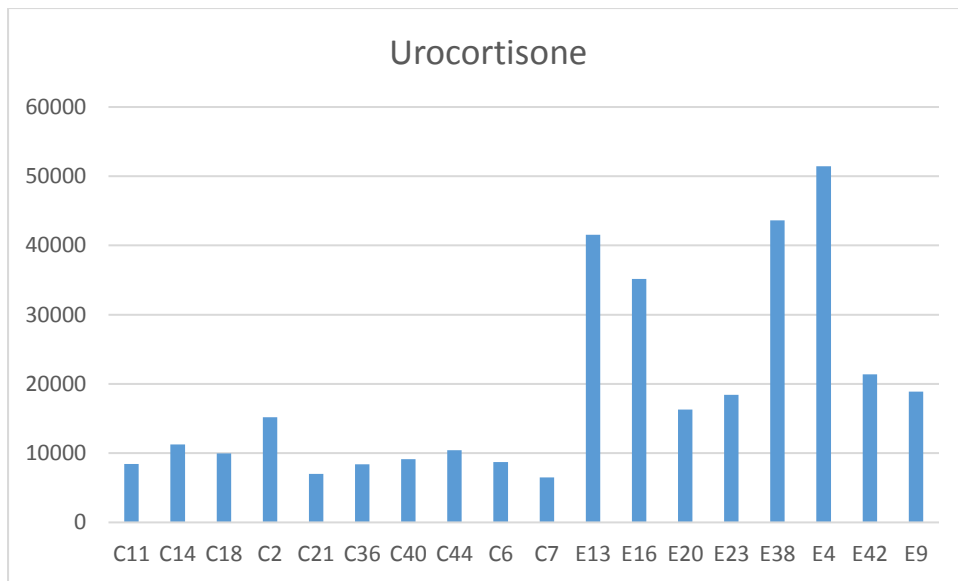

**Figure S70** Urocortone in baseline and pre-80K samples

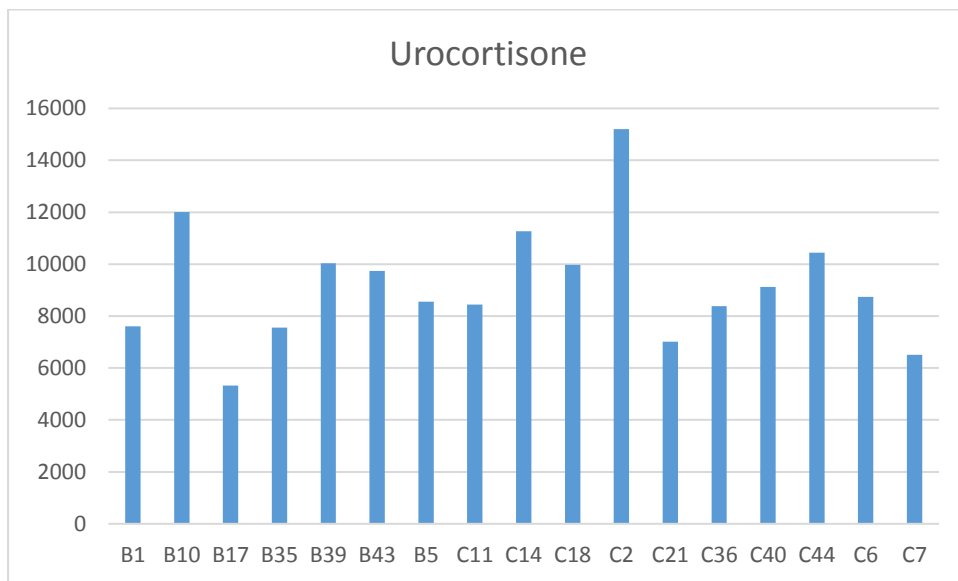

**Figure S71** Hypoxanthine in pre-80K and post-80K samples

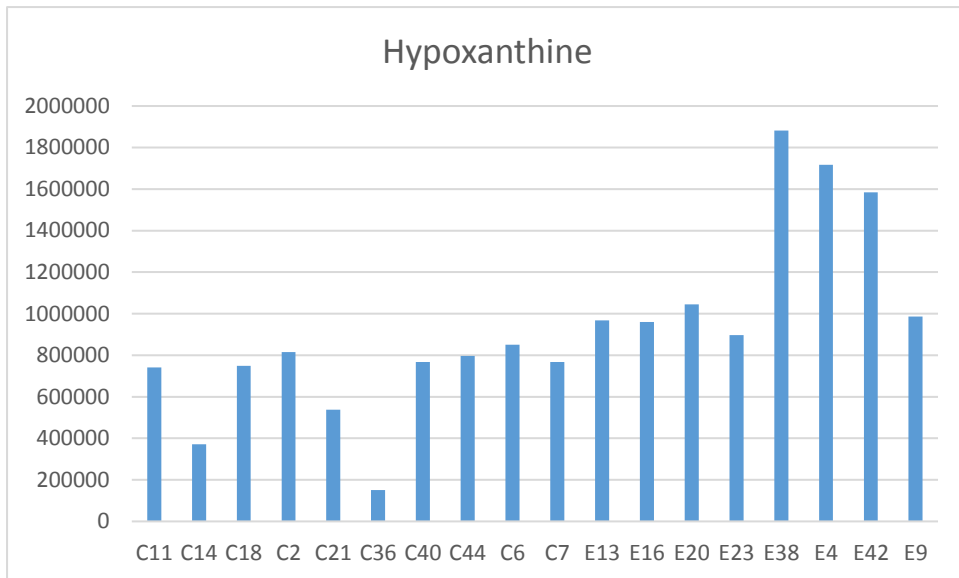

**Figure S72** Hypoxanthine in baseline and pre-80K samples

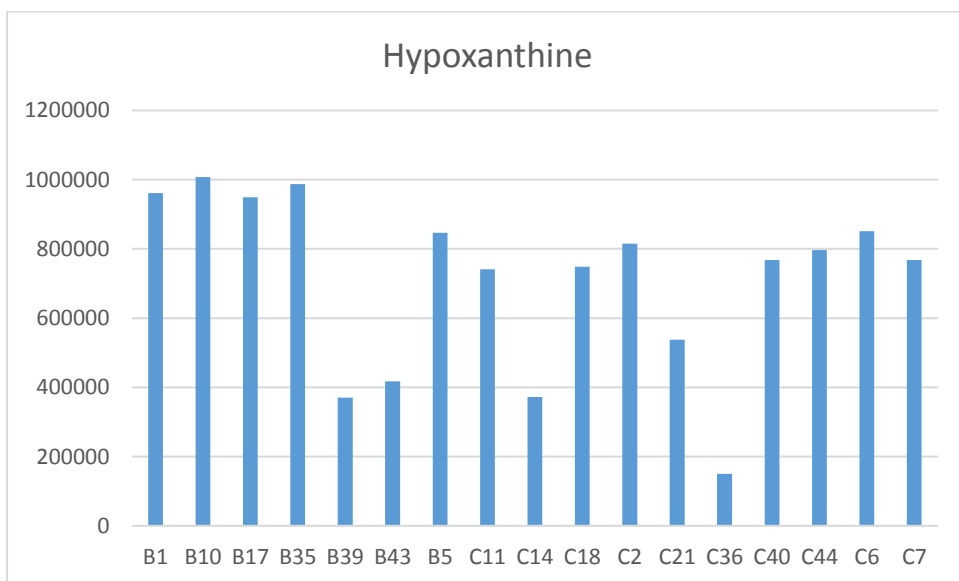

**Figure S73** Uridine in pre-80K and post-80K samples

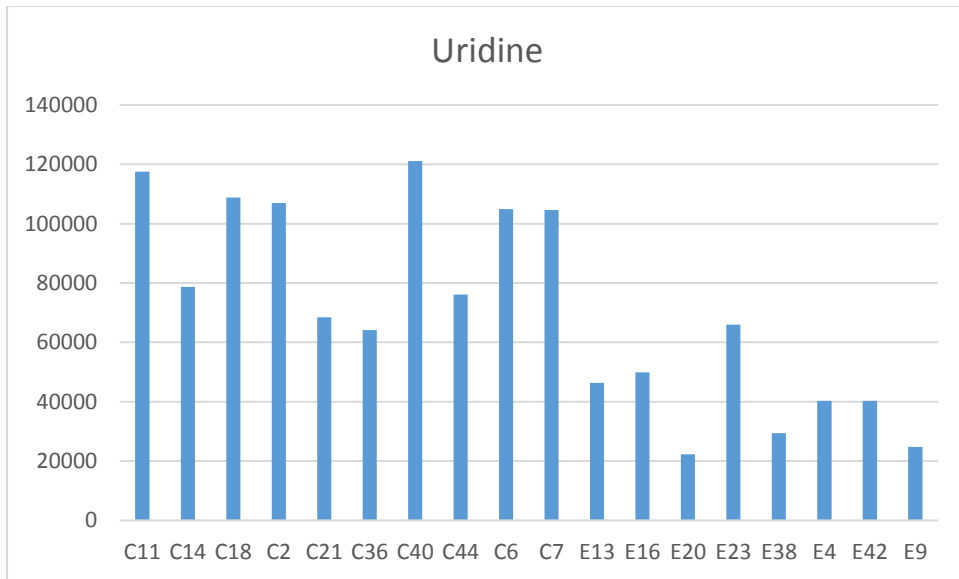

**Figure S74** Uridine in baseline and pre-80K samples

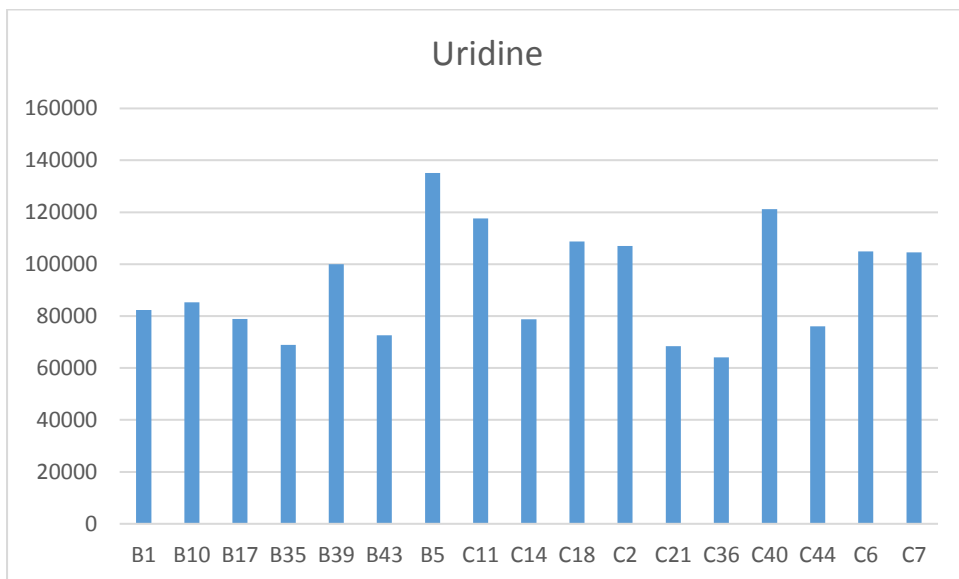

**Figure S75** Hydroxycholanate in pre-80K and post-80K samples

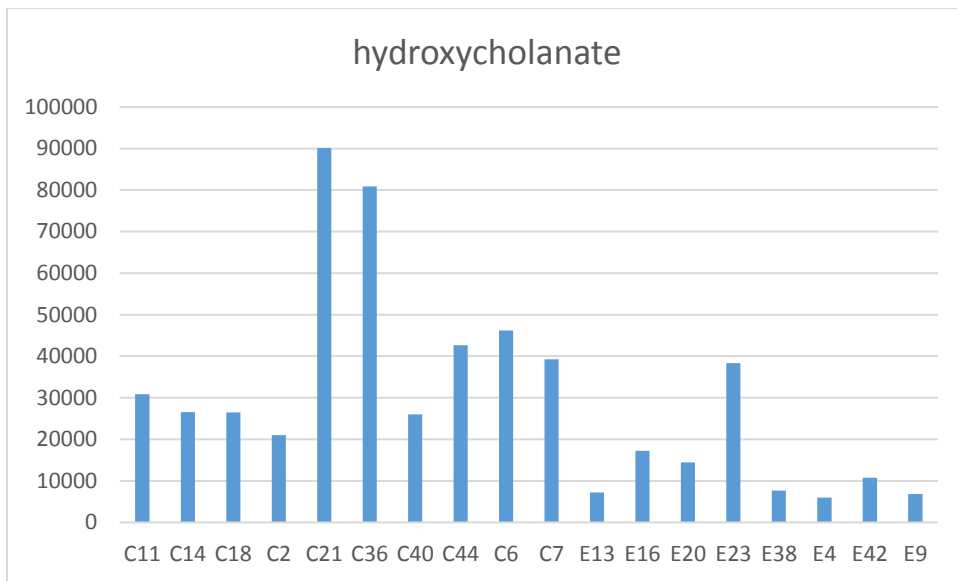

**Figure S76** Hydroxycholanate in baseline and pre-80K samples

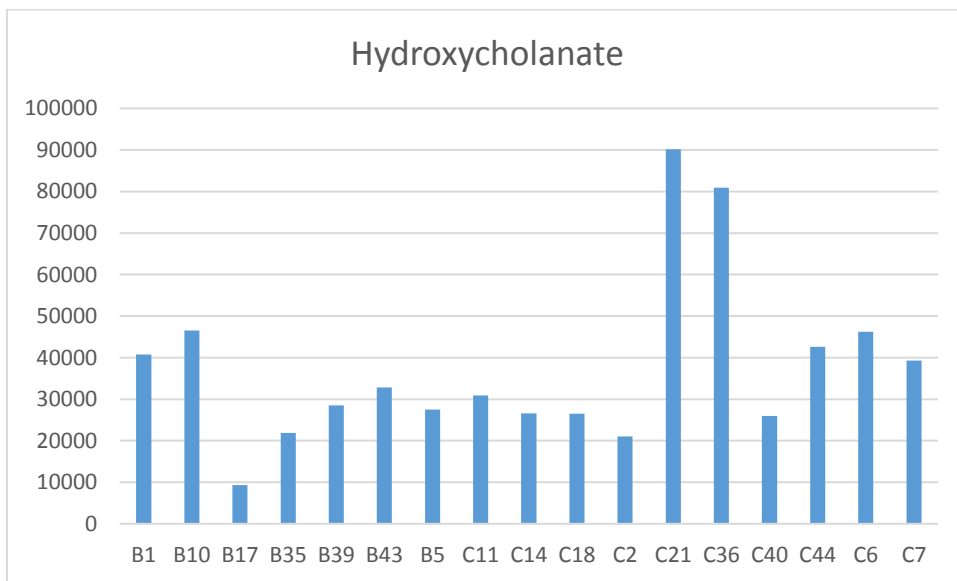

**Figure S77** Glycolic acid in pre-80K and post-80K samples

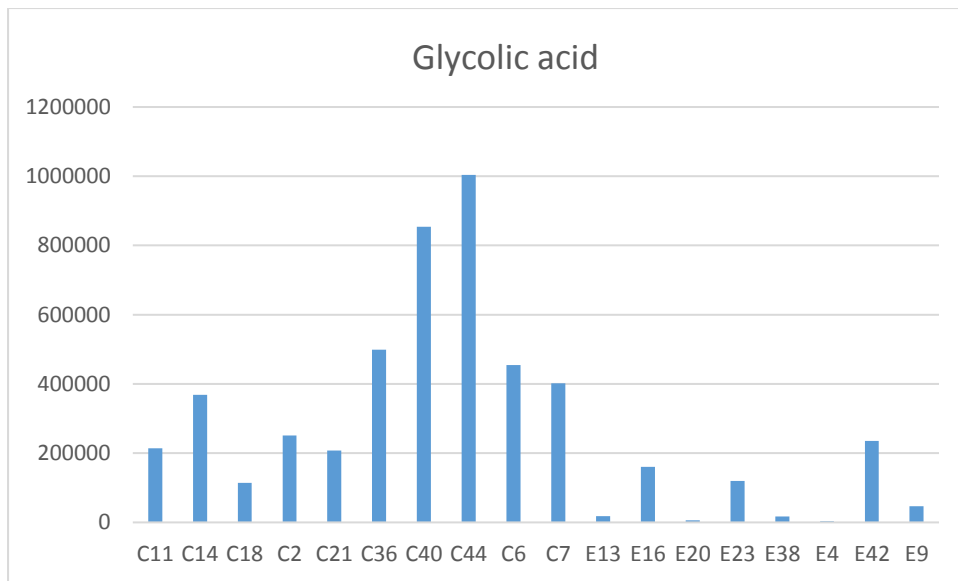

**Figure S78** Glycolic acid in baseline and pre-80K samples

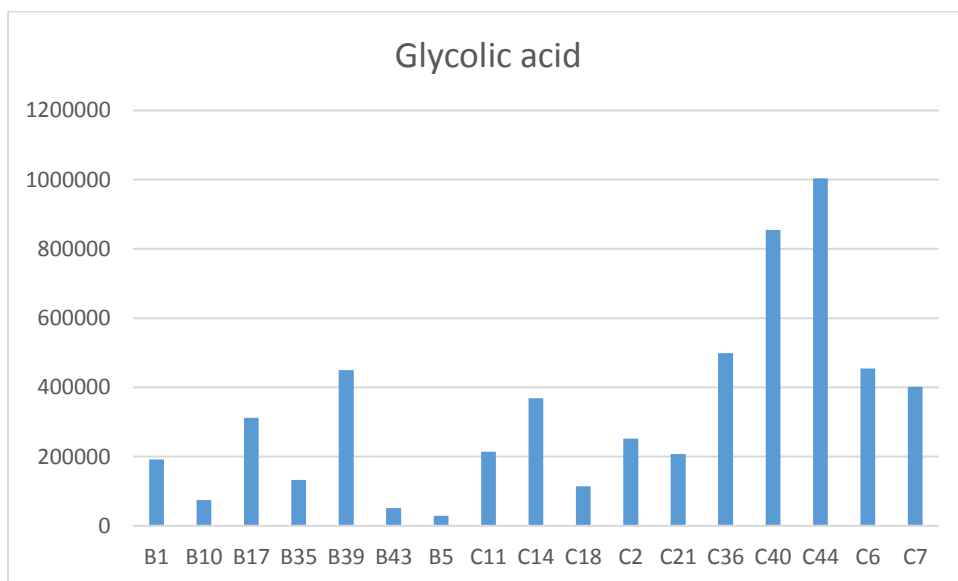

**Figure S79**  $\alpha$ -tocopherol in pre-80K and post-80K samples

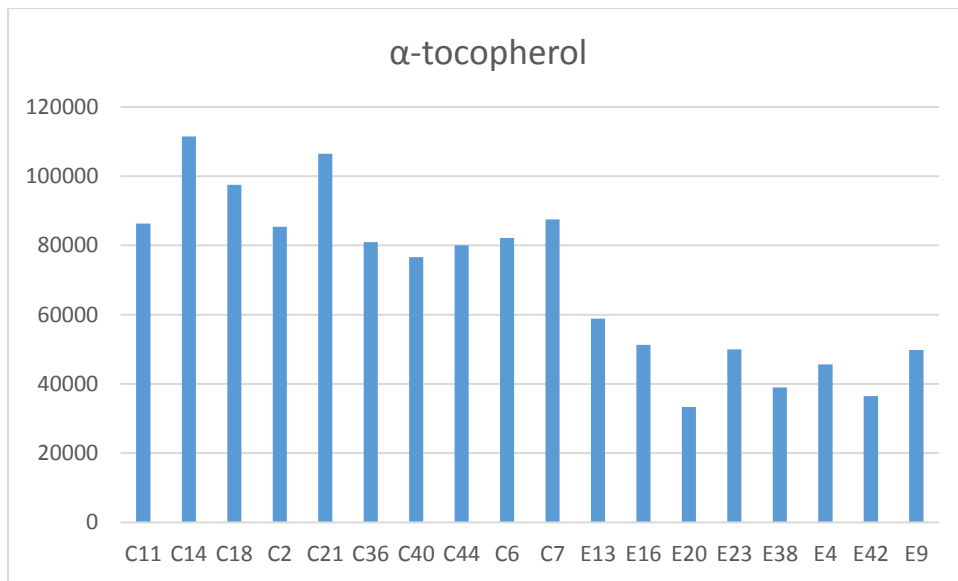

**Figure S80**  $\alpha$ -tocopherol in baseline and pre-80K samples

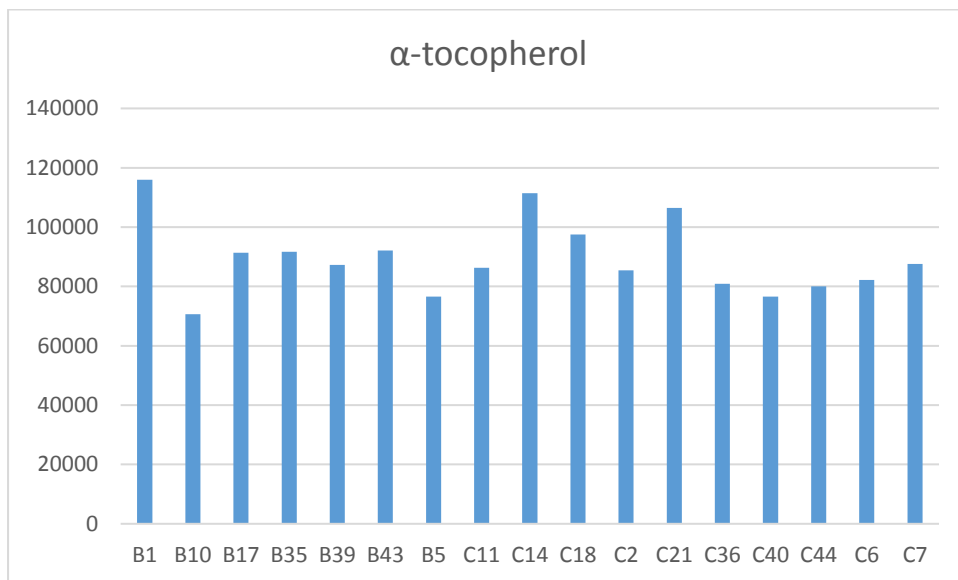

**Figure S81** Extracted ion traces for hydroxyoctadecadienoic acids in a pre-80.5km sample and a post-80.5km sample run on an ACE C4 column.

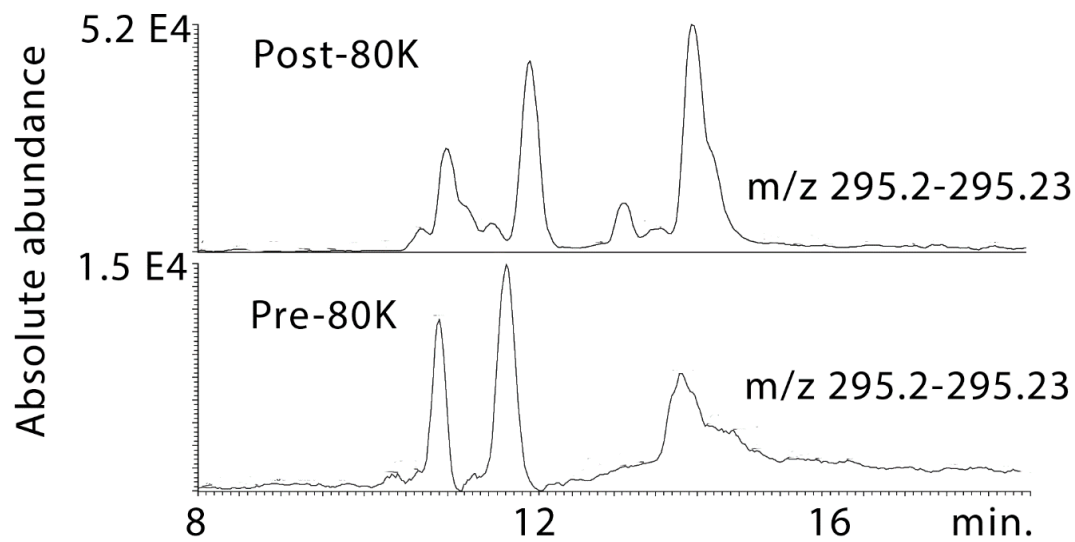

Supplement: metabolites-08-00014-s001.pdf [file metabolites-08-00014-s001.pdf]
